# Supplementary material for: Fruit and vegetable intake and body adiposity among populations in Eastern Canada: the Atlantic Partnership for Tomorrow’s Health Study
Source: PubMed Central journal article supplement — BMJ Open. 2018 Apr 10;8(4):e018060. doi: 10.1136/bmjopen-2017-018060 (PMC5898328; doi:10.1136/bmjopen-2017-018060), 2018-04-10
Supplement: bmjopen-2017-018060.draft_revisions.pdf [file bmjopen-2017-018060.draft_revisions.pdf]

# BMJ Open

BMJ Open is committed to open peer review. As part of this commitment we make the peer review history of every article we publish publicly available.

When an article is published we post the peer reviewers' comments and the authors' responses online. We also post the versions of the paper that were used during peer review. These are the versions that the peer review comments apply to.

The versions of the paper that follow are the versions that were submitted during the peer review process. They are not the versions of record or the final published versions. They should not be cited or distributed as the published version of this manuscript.

BMJ Open is an open access journal and the full, final, typeset and author-corrected version of record of the manuscript is available on our site with no access controls, subscription charges or pay-per-view fees (<http://bmjopen.bmj.com>).

If you have any questions on BMJ Open's open peer review process please email [info.bmjopen@bmj.com](mailto:info.bmjopen@bmj.com)

# BMJ Open

## Fruit and Vegetable Intake and Body Adiposity among Populations in Eastern Canada: the Atlantic Partnership for Tomorrow's Health Study

|                                 |                                                                                                                                                                                                                                                                                                                                                                                                                                                                                                                                                                 |
|---------------------------------|-----------------------------------------------------------------------------------------------------------------------------------------------------------------------------------------------------------------------------------------------------------------------------------------------------------------------------------------------------------------------------------------------------------------------------------------------------------------------------------------------------------------------------------------------------------------|
| Journal:                        | <i>BMJ Open</i>                                                                                                                                                                                                                                                                                                                                                                                                                                                                                                                                                 |
| Manuscript ID                   | bmjopen-2017-018060                                                                                                                                                                                                                                                                                                                                                                                                                                                                                                                                             |
| Article Type:                   | Research                                                                                                                                                                                                                                                                                                                                                                                                                                                                                                                                                        |
| Date Submitted by the Author:   | 02-Jun-2017                                                                                                                                                                                                                                                                                                                                                                                                                                                                                                                                                     |
| Complete List of Authors:       | Yu, Zhijie; Dalhousie University, Pediatrics<br>DeClercq, Vanessa; Dalhousie University, Pediatrics<br>Cui, Yunsong; Dalhousie University, Pediatrics<br>Forbes, Cynthia; Dalhousie University, School of Health and Human Performance<br>Grandy, Scott; Dalhousie University, School of Health and Human Performance<br>Keats, Melanie; Dalhousie University, School of Health and Human Performance<br>Parker, Louise; Dalhousie University, Pediatrics<br>Sweeney, Ellen; Dalhousie University, Pediatrics<br>Dummer, Trevor; University of British Columbia |
| <b>Primary Subject Heading</b>: | Epidemiology                                                                                                                                                                                                                                                                                                                                                                                                                                                                                                                                                    |
| Secondary Subject Heading:      | Public health, Epidemiology, Nutrition and metabolism                                                                                                                                                                                                                                                                                                                                                                                                                                                                                                           |
| Keywords:                       | EPIDEMIOLOGY, NUTRITION & DIETETICS, PUBLIC HEALTH                                                                                                                                                                                                                                                                                                                                                                                                                                                                                                              |
|                                 |                                                                                                                                                                                                                                                                                                                                                                                                                                                                                                                                                                 |

SCHOLARONE™  
Manuscripts

1  
2  
3 **Fruit and Vegetable Intake and Body Adiposity among Populations in Eastern Canada: the**  
4 **Atlantic Partnership for Tomorrow's Health Study**  
5  
6  
7

8  
9 **Running title:** Fruit and Vegetable Intake and Body Adiposity  
10  
11  
12  
13  
14  
15

16 Zhijie Michael Yu<sup>1</sup>, PhD, Vanessa DeClercq<sup>1</sup>, PhD, Yunsong Cui<sup>1</sup>, MSc, Cynthia Forbes<sup>1,2</sup>, PhD, Scott  
17 Grandy<sup>2</sup>, PhD, Melanie Keats<sup>2</sup>, PhD, Louise Parker<sup>1</sup>, PhD, Ellen Sweeney<sup>1</sup>, PhD, Trevor J.B. Dummer<sup>3</sup>,  
18 PhD  
19  
20  
21  
22  
23

24 <sup>1</sup>Population Cancer Research Program, Department of Paediatrics, Dalhousie University, Halifax, NS,  
25 Canada  
26  
27

28 <sup>2</sup>School of Health and Human Performance, Dalhousie University, Halifax, NS, Canada  
29

30 <sup>3</sup>Centre of Excellence in Cancer Prevention, School of Prevention and Public Health, University of British  
31 Columbia, Vancouver, BC, Canada  
32  
33  
34  
35  
36

37 Correspondence to: Dr. Zhijie Michael Yu, Population Cancer Research Program, Department of  
38 Paediatrics, Dalhousie University, 1494 Carlton St., Halifax, NS, Canada, B3H 4R2, Tel: 902-494-3049,  
39 Fax: 902-494-2089, Email. [zhijie.yu@dal.ca](mailto:zhijie.yu@dal.ca) or [zhijie.m.yu@gmail.com](mailto:zhijie.m.yu@gmail.com)  
40  
41  
42  
43  
44

45 Word count text: 2931; abstract: 228  
46

47 Number of tables: 3; number of figures: 2;  
48

49 Number of supplementary tables: 2; number of supplementary figure: 1  
50

51 References: 31  
52  
53  
54  
55  
56  
57  
58  
59  
60

## Abstract

**Objectives:** The prevalence of obesity among populations in the Atlantic Provinces is the highest in Canada. Some studies suggest that adequate fruit and vegetable consumption may help body weight management. We assessed the associations between fruit and vegetable intake with body adiposity among individuals who participated in the baseline survey of the Atlantic Partnership for Tomorrow's Health (Atlantic PATH) cohort study.

**Methods:** We carried out a cross-sectional analysis among 26340 individuals (7979 men and 18361 women) aged 35-69 years who were recruited in the baseline survey of the Atlantic PATH study. Data on fruit and vegetable intake, sociodemographic and behavioural factors, chronic disease, anthropometric measurements, and body composition were included in the analysis.

**Results:** In the multivariable regression analyses, one standard deviation increment of total fruit and vegetable intake was inversely associated with BMI ( $-0.12 \text{ kg/m}^2$ ; 95% CI,  $-0.19, -0.05$ ), waist circumference ( $-0.40 \text{ cm}$ ; 95% CI,  $-0.58, -0.23$ ), percentage fat mass ( $-0.30 \%$ ; 95% CI,  $-0.44, -0.17$ ), and fat mass index ( $-0.14 \text{ kg/m}^2$ ; 95% CI,  $-0.19, -0.08$ ). Fruit intake, but not vegetable intake, was consistently inversely associated with anthropometric indices, fat mass, obesity, and abdominal obesity.

**Conclusions:** Fruit and vegetable consumption was inversely associated with body adiposity among the participant population in Atlantic Canada. This association was primarily attributable to fruit intake. Longitudinal studies and randomized trials are warranted to confirm these observations and investigate the underlying mechanisms.

### Strengths and limitations of this study

- Data from a large-scale population-based survey with objectively measured body composition.
- Associations between fruit and vegetable intake with body adiposity measurements were assessed in combination and separately using multivariable regression models.
- Limitations of a cross-sectional analysis with an unrepresentative sample.

For peer review only

## Introduction

The increasing prevalence of obesity, a major risk factor for a variety of chronic diseases, including coronary heart disease, stroke, diabetes mellitus, and some cancers, is a critical worldwide public health concern.<sup>1</sup> People living in Atlantic Canada have the highest prevalence of obesity (BMI  $\geq$  30 kg/m<sup>2</sup>) among the Canadian population. In 2011, the prevalence of obesity ranged from 24% in Prince Edward Island to 28% in Newfoundland and Labrador. It is predicted that the percentage of people who are overweight or obese will continue to increase.<sup>2</sup> Appropriate strategies to effectively halt the obesity epidemic among populations in this region (and other areas) are of critical public health interest.

Fruits and vegetables are important components of a healthy diet, contributing to a large proportion of an individual's daily intake of vitamins, minerals, and dietary fibre. Health Canada recommends that adults should consume 7-10 servings of a variety of fruits and vegetables per day to reduce the risks of cancer and other chronic diseases.<sup>3</sup> Further, substantial evidence has shown that increased consumption of fruits and vegetables may reduce the risks of mortality from all causes<sup>4</sup> and the development of cardiometabolic disease.<sup>5-8</sup> Interestingly, some systematic reviews have suggested that appropriately increased fruit and vegetable intake may help body weight management by preventing the development of obesity and reducing body weight over time.<sup>9-12</sup> However, one meta-analysis of interventional trials showed that increased fruit and vegetable intake had an effect on weight loss<sup>11</sup>; another study did not find an effect in terms of body weight reduction.<sup>13</sup> A Canadian study found that increased fruit intake was associated with reduced weight gain over a six-year period among participants of the Quebec Family Study.<sup>14</sup> Additionally, some studies suggest that fruit consumption might have a more favourable impact on body weight control than vegetable consumption.<sup>9,15</sup>

We hypothesize that fruit and vegetable consumption may play a role in the obesity epidemic among populations living in Atlantic Canada. The primary aims of this study were to assess: 1) the intake of fruits, vegetables, and 100% fruit or vegetable juice; and 2) associations between fruit, vegetable, and

1  
2  
3 100% fruit or vegetable juice intake with anthropometric indices and body composition among  
4  
5 participants who were enrolled in the baseline survey of the Atlantic Partnership for Tomorrow's Health  
6  
7 (Atlantic PATH) study. We further assessed how the consumption of fruit, vegetable, and 100% fruit or  
8  
9 vegetable juice were associated with body adiposity measurements by considering these three components  
10  
11 as one food group and treating them independently in the multivariable logistic regression analyses.<sup>15,16</sup>  
12  
13

## 14 15 16 **Methods**

### 17 18 *Study population*

19  
20 The Atlantic PATH study is a part of the Canadian Partnership for Tomorrow Project (CPTP), a pan-  
21  
22 Canadian longitudinal cohort study examining the role of genetic, environmental, behavioural and  
23  
24 lifestyle factors in the development of cancer and chronic disease.<sup>17</sup> The Atlantic PATH study is a  
25  
26 population-based cohort in which study participants were residents of one of the four Atlantic Canadian  
27  
28 Provinces (Nova Scotia, New Brunswick, Newfoundland and Labrador, and Prince Edward Island) and  
29  
30 aged between 35 and 69 years. Study participants were recruited from the general public through a  
31  
32 combination of community outreach and awareness activities, advertising and media campaigns, and  
33  
34 invitation. During 2009 to 2015, 31173 Atlantic PATH study participants, including 9445 men and 21728  
35  
36 women, were recruited from the four Atlantic Canada provinces. The study was approved by appropriate  
37  
38 Research Ethics Boards in each province. All participants provided written informed consent prior to  
39  
40 participation. All data collection procedures followed the research protocol guidelines as approved by the  
41  
42 Research Ethics Boards.  
43  
44

45  
46  
47 We excluded 4833 participants from this analysis as a result of current pregnancy (n=40), missing data on  
48  
49 fruit, vegetable, and 100% fruit or vegetable juice (n=816), anthropometric indices (n=4127), and other  
50  
51 variables (n=90). The final analysis sample was comprised of 26340 participants (7979 men and 18361  
52  
53 women).  
54  
55  
56  
57

### ***Data collection***

Data collection procedures have been reported previously.<sup>18</sup> In brief, a set of standardised questionnaires on sociodemographic, health status, medication use, diet, lifestyle factors, and self-measured anthropometric indices were completed by participants. Physical measurements (including anthropometric indices and body composition) were measured by research nurses at an assessment centre.

### ***Assessment of fruit and vegetable consumption***

Consumption of fruit, vegetable, and 100% fruit or vegetable juice were assessed by using three questions: 1) In a typical day, how many servings of vegetable do you eat? One serving is about ½ cup or 125 ml of fresh, frozen, canned, or cooked vegetables. 2) In a typical day, how many servings of fruit do you eat? One serving is about ½ cup or 125 ml of fresh, frozen, or canned fruit. 3) In a typical day, how many servings of 100% fruit or vegetable juice do you drink? One serving is about ½ cup or 125 ml.

### ***Assessment of sociodemographic and behavioural factors***

Ethnicity was categorized as white and non-white because there was little ethnic diversity in the cohort. Educational attainment was categorized as high school or lower, college level, and university level or higher. Marital status was grouped as married or living together and single, divorced, separated, or widowed. For smoking behaviour, participants were grouped as non-smoker, former smoker, and current smoker. For alcohol drinking, respondents were classified as abstainer, occasional drinker (>0- ≤ 2-3 times/month), regular drinker (≥ 1 time/week - ≤ 2-3 times/week), and habitual drinker (≥ 4-5 times/week).<sup>18</sup>

Physical activity was assessed by using either the long or short form of the International Physical Activity Questionnaire (IPAQ).<sup>19</sup> For evaluation of total physical activity, we calculated metabolic equivalent minutes per week (MET-min/week) for each participant with data derived from the long and short form questionnaires, respectively. The MET scores were computed according to the IPAQ scoring protocol.<sup>20</sup>



1  
2  
3 We then ranked the sex-specific total MET scores into tertiles for data derived from the long and short  
4 form questionnaires, separately. Levels of total physical activity were classified as low, medium, and high  
5 by the low to high MET score tertiles.  
6  
7  
8  
9

### 10 11 *Assessment of chronic diseases*

12 Self-reported current medication use was collected and medication data were coded according to the Nova  
13 Scotia Formulary (NSF) ([www.nspharmacare.ca](http://www.nspharmacare.ca)).<sup>21</sup> The NSF uses the standardised Anatomical  
14 Therapeutic Chemical (ATC) Classification System which was developed by the World Health  
15 Organization. Participants also reported chronic diseases diagnosed by a physician. For this analysis, we  
16 defined chronic disease (yes/no) based upon the following: (a) self-reported diabetes mellitus and/or  
17 current use of antidiabetic medications, or (b) self-reported myocardial infarction, stroke and/or current  
18 use of CVD medications, or (c) self-reported cancer.  
19  
20  
21  
22  
23  
24  
25  
26  
27  
28  
29

### 30 31 *Physical measurements*

32 Body weight, percentage fat mass, fat mass, and fat free mass were measured using the Tanita  
33 bioelectrical impedance device (Tanita BC-418, Tanita Corporation of America Inc., Arlington Heights,  
34 Illinois). Height was measured by a Seca stadiometer. BMI was calculated as weight in kilograms divided  
35 by height in meters squared. We also calculated fat mass index (FMI) and fat free mass index (FFMI) by  
36 dividing fat mass and fat free mass in kilograms by height in meters squared, respectively. Waist and hip  
37 circumferences were measured by using Lufin steel tape. Obesity was defined as a BMI  $\geq 30$  kg/m<sup>2</sup>.  
38  
39  
40  
41  
42  
43  
44  
45 Abdominal obesity was defined as a waist circumference  $\geq 102$  cm for men or  $\geq 88$  cm for women.<sup>22</sup>  
46  
47  
48  
49

50 Among our study participants, measured data were available for 72% of participants for weight and  
51 height, 69% for both waist and hip circumferences, and 70% for body composition. For participants who  
52 did not have measured anthropometric indices, self-reported measures were utilized in the analyses.  
53  
54  
55  
56  
57

### *Statistical analyses*

We computed Pearson partial correlation coefficients between fruit and vegetable intake and anthropometric measures and body composition with adjustment for age and sex. To examine the associations between fruit and vegetable intake with obesity, we derived z-scores for the intakes of total fruit and vegetable, vegetable, fruit, and fruit or vegetable juice, respectively. We categorized total fruit and vegetable, vegetable, and fruit intake into low, medium, and high levels according to the approximate tertiles, respectively. Fruit or vegetable juice intake was dichotomized (yes/no) as 49% of the participants did not consume fruit or vegetable juice. We utilized multiple linear regression models with Robust M estimator to evaluate the associations between fruit and vegetable intake with BMI, waist circumference, percentage fat mass, and FMI. We employed multiple logistic regression models to compute the odds ratios (OR) and 95% confidence intervals (CI) of having obesity and abdominal obesity across different levels of fruit and vegetable intake. To evaluate the independent associations between consumption of fruit, vegetable, and fruit or vegetable juice with obesity, we performed both the linear and logistic regression analyses using three models: model one was adjusted for age, sex, and province; model two was further adjusted for ethnicity, socioeconomic status, behavioural factors, and chronic disease based on model one; and model three was additionally and mutually adjusted for fruit, vegetable, and fruit or vegetable juice intake based on model two.

Further, as we found a consistent inverse association between daily fruit intake and adiposity, we plotted the associations of fruit intake with BMI, waist circumference, percentage fat mass, and FMI by using the restricted cubic spline (RCS).<sup>23</sup> We performed the RCS plot among participants who reported daily fruit intake  $\leq 6$  servings/day (99.5% of total participants) and utilized three knots located at the 5<sup>th</sup>, 50<sup>th</sup>, and 95<sup>th</sup> percentiles of the fruit intake distribution. All the models were multivariable with adjustment for all of the covariables and the intakes of vegetable and fruit or vegetable juice. Given that energy expenditure has been shown to be strongly and inversely associated with body adiposity,<sup>1,18</sup> we also analysed the interactions between fruit intake and physical activity in relation to risks of obesity and abdominal

1  
2  
3 obesity. In addition, we evaluated whether substituting one standard deviation (SD) of fruit intake for  
4 vegetable intake or vice versa might affect obesity risk by using multivariable logistic regression  
5 models.<sup>16</sup> We carried out a sensitivity analysis among participants with all measured body adiposity  
6 measurements (n=17528) and yielded a similar pattern of results. We, therefore, reported the results for  
7 the entire samples. Statistical significance was defined as  $P < 0.05$  (two-sided). Data management and  
8 analyses were performed with SAS for Windows, version 9.4 (SAS Institute, Cary, North Carolina).  
9  
10  
11  
12  
13  
14  
15

## 16 17 18 **Results**

### 19 ***Fruit and vegetable consumption among study participants***

20  
21 Average total fruit and vegetable intake was 5.4 servings per day in the study participants (4.9  
22 servings/day in men and 5.6 servings/day in women). Only 22% of men and 32% of women reported total  
23 fruit and vegetable intake  $\geq 7$  servings/day, respectively (Table 1 and Supplementary Table 1). The  
24 correlation between fruit or vegetable juice intake with fruit intake was higher compared with that for  
25 vegetable intake. Participants who reported high levels of fruit and vegetable intake were more likely to  
26 be females, white, married, have higher levels of education, and engage in higher levels of physical  
27 activity. They were also less likely to be current smokers compared with those who reported low levels of  
28 fruit and vegetable consumption (data not shown).  
29  
30  
31  
32  
33  
34  
35  
36  
37  
38  
39  
40

### 41 ***Fruit and vegetable consumption and body adiposity***

42  
43 There was a consistently negative correlation between fruit and vegetable intake with body adiposity  
44 measures (Supplementary Table 1). There was no statistically significant correlation between fruit and  
45 vegetable intake with FFMI.  
46  
47  
48  
49  
50

51  
52 In the multivariable linear regression analyses, one SD increment of total fruit and vegetable intake was  
53 inversely associated with BMI ( $-0.12 \text{ kg/m}^2$ ; 95% CI,  $-0.19, -0.05$ ), waist circumference ( $-0.40 \text{ cm}$ ; 95%  
54 CI,  $-0.58, -0.23$ ), percentage fat mass ( $-0.30 \%$ ; 95% CI,  $-0.44, -0.17$ ), and FMI ( $-0.14 \text{ kg/m}^2$ ; 95% CI, -  
55  
56  
57

0.19, -0.08) (Table 2). In the multivariable logistic regression analyses, individuals with high levels of total fruit and vegetable intake had reduced likelihoods of 12% (OR, 0.88; 95% CI, 0.83, 0.94) for having abdominal obesity compared with those with low levels ( $P$  for trend  $< 0.001$ , Table 3).

### ***Independent associations of fruit, vegetable, and fruit or vegetable juice consumption with body adiposity***

In the multivariable regression analyses, fruit consumption was consistently inversely associated with adiposity measurements (Table 2 and Figure 1) and the likelihoods for obesity and abdominal obesity (Table 3). Compared with those with low levels of fruit consumption, individuals with medium to high levels of fruit consumption had ORs of 0.92 (95% CI, 0.86, 0.98) and 0.90 (95% CI, 0.84, 0.96) for obesity and 0.97 (95% CI, 0.91, 1.03) and 0.88 (95% CI, 0.82, 0.94) for abdominal obesity, respectively (All  $P$  for trend  $< 0.05$ ). These associations remained materially unchanged after further controlling for the intake of vegetable and fruit or vegetable juice. The similar associations were evident for juice intake but were less consistent than those observed for fruit intake. Moreover, fruit consumption was shown to have additive effects with total physical activity in terms of the likelihoods for obesity and abdominal obesity (Supplementary Figure 1).

The inverse association between vegetable consumption and obesity was attenuated and became positive after further controlling for the intakes of fruit and fruit or vegetable juice (Table 3). Further analyses showed that substituting one SD of the intakes of fruit and juice for vegetables resulted in the reduced likelihoods for obesity (Figure 2 and Supplementary Table 2). Conversely, substituting one SD of vegetable intake for fruit and juice led to the increased likelihoods for obesity.

### **Discussion**

In this large-scale, population-based cross-sectional analysis, we found that total daily fruit and vegetable intake among Atlantic Canadians was comparable to those reported from a nationally representative

1  
2  
3 sample of Canadians.<sup>24</sup> We observed that total fruit and vegetable intake was inversely associated with  
4 body adiposity. This association appeared to be primarily attributable to fruit consumption. These  
5 findings are in line with the previous studies reporting the potentially favourable role of fruit consumption  
6 in effective body weight management.<sup>9,14,15</sup> However, after controlling for the consumption of fruit, fruit  
7 or vegetable juice, and other covariables, vegetable intake tended to be positively related to obesity. This  
8 finding is consistent with that reported in a longitudinal study carried out in American women.<sup>15</sup>  
9  
10  
11  
12  
13  
14  
15  
16 However, the mechanisms underlying these observed associations is unclear.

17  
18  
19  
20 Thus far, substantial evidence appears to show that adequate fruit and vegetable consumption reduces the  
21 risk of chronic disease.<sup>25</sup> With respect to body weight management, regular daily fruit consumption may  
22 displace energy-dense foods, resulting in attenuated dietary energy density and reduced total energy  
23 intake.<sup>26</sup> Fruits have abundant soluble dietary fibres which may enhance post-meal satiety and decrease  
24 both glycaemic index and glycaemic load of consumed foods causing lowered energy absorption.<sup>27</sup>  
25  
26  
27  
28  
29  
30 Moreover, fruits are rich in phytochemicals that have anti-oxidative and anti-inflammatory effects against  
31 the obesity-induced oxidative stress and subclinical inflammation.<sup>25,28</sup> While most vegetables have these  
32 characteristics, in multivariable regression analyses, we observed a different association between  
33 vegetable intake and obesity from those for fruit consumption.

34  
35  
36  
37  
38  
39  
40  
41 In our analyses, the association between 100% fruit or vegetable juice and obesity was similar to the  
42 association between fruit and obesity. Some longitudinal studies have shown that a vegetable-rich dietary  
43 pattern might lead to increased body weight<sup>29</sup> and an unhealthful plant-based diet that was featured with  
44 sweetened foods and beverages, refined grains, and potatoes might be related to increased incidence of  
45 type 2 diabetes.<sup>30</sup> Regular potato intake, especially french fries, was associated with obesity.<sup>31</sup> These  
46 findings may imply that some fatty substances added during the preparation of vegetables and the type of  
47 vegetable consumed (e.g., starchy vegetables), might play a role in the positive association between  
48 increasing vegetable intake and increasing obesity. Our data appeared to support this hypothesis as oil  
49  
50  
51  
52  
53  
54  
55  
56  
57

1  
2  
3 products and starchy vegetables are seldom used to prepare 100% juice. Nevertheless, further research is  
4  
5 needed to clarify the potential role of vegetable intake in obesity development.  
6  
7

8  
9 To our knowledge, this is the first large-scale, population-based study investigating the associations  
10  
11 between fruit and vegetable intake with objectively measured body composition. Our findings imply that  
12  
13 fruit and vegetable consumption may need to be assessed separately to evaluate the relationship between  
14  
15 fruit and vegetable intake and body weight changes. To investigate the influence of fruit and vegetable  
16  
17 intake on body weight management, body fat mass assessment may be considered as an important  
18  
19 measurement along with anthropometrics.  
20  
21  
22  
23

24 The large sample size and the objectively measured body composition are major strengths of this study.  
25  
26 Nevertheless, our study has some limitations. Firstly, our study participants were not a representative  
27  
28 sample of the populations of Atlantic Canada and the majority were Caucasians. Thus this may limit the  
29  
30 generalizability of our study findings to other populations. Secondly, due to the constraints of the data  
31  
32 collection, we were not able to calculate the total energy intake of study participants and analyse the  
33  
34 associations between different types of fruit and vegetable consumption with the study outcomes.  
35  
36 However, we controlled for total physical activity in the multivariable regression analyses and found an  
37  
38 additive effect of the interactions between fruit intake and physical activity on obesity risk. These findings  
39  
40 suggested that the observed association between fruit intake and obesity risk was independent of energy  
41  
42 expenditure. Thirdly, the cross-sectional nature of the study design did not enable us to make a causal  
43  
44 inference.  
45  
46  
47  
48

49 In summary, our findings suggested that higher levels of fruit and vegetable consumption were associated  
50  
51 with lower levels of body adiposity. Fruit intake was consistently inversely associated with fat mass and  
52  
53 obesity. While evidence regarding the positive health effects of vegetable consumption on chronic disease  
54  
55 is substantial,<sup>25</sup> our findings may indicate that further research is needed to investigate whether the types  
56  
57

1  
2  
3 of vegetable consumed and culinary approaches adopted for vegetable preparation are also important for  
4  
5 the effective management of body weight. Given four in five men and two in three women in our study  
6  
7 populations did not report adequate fruit and vegetable intake, there is a need to implement  
8  
9 comprehensive intervention strategies to promote frequent and adequate fruit and vegetable consumption  
10  
11 across Atlantic Canada.  
12  
13  
14  
15  
16  
17  
18  
19  
20  
21  
22  
23  
24  
25  
26  
27  
28  
29  
30  
31  
32  
33  
34  
35  
36  
37  
38  
39  
40  
41  
42  
43  
44  
45  
46  
47  
48  
49  
50  
51  
52  
53  
54  
55  
56  
57  
58  
59  
60

For peer review only

**Acknowledgments:**

We acknowledge the support of all participants in the Atlantic PATH Project. We thank the Atlantic PATH team members for data collection and management.

Production of this study has been made possible through the financial support from the Canadian Partnership Against Cancer and Health Canada. The study funders had no involvement in the study design; in the collection, analysis and interpretation of data; in the writing of the report; and in the decision to submit the article for publication. The views expressed herein represent the views of the authors and do not necessarily represent the views of the funders.

**Authors' contributions:**

Study conception and design: ZY, LP, and TD

Acquisition, analysis, and interpretation of data and drafting of manuscript: ZY

Critical revision of the article: VD, YC, CF, SG, MK, LP, ES, and TD

All authors have full access to all the data in the study, take responsibility for the integrity of the data and the accuracy of the data analysis, and give final approval of the version to be submitted.

**Conflict of interest:** None to declare.

**Data sharing statement:**

No datasets were generated during the current study. Data from the Atlantic PATH study is not publicly available to researchers without an approved data access request to Atlantic PATH, as per the Atlantic PATH consent form and study protocol. While the authors cannot provide data to a third party directly, the dataset can be provided by Atlantic PATH following a data access request approval. Interested researchers should contact Atlantic PATH (<http://atlanticpath.ca/>).



## References

- 1 Haslam DW, James WPT. Obesity. *Lancet* 2005; **366**: 1197–1209.
- 2 Twells LK, Gregory DM, Reddigan J, Midodzi WK. Current and predicted prevalence of obesity in Canada: a trend analysis. *CMAJ Open* 2014; **2**: E18-26.
- 3 Health Canada. How many food guide servings of fruits and vegetables do I need? - Canada's Food Guide. 2007. <http://www.hc-sc.gc.ca/fn-an/food-guide-aliment/choose-choix/fruit/need-besoin-eng.php> (accessed 14 Mar2016).
- 4 Wang X, Ouyang Y, Liu J, Zhu M, Zhao G, Bao W *et al*. Fruit and vegetable consumption and mortality from all causes, cardiovascular disease, and cancer: systematic review and dose-response meta-analysis of prospective cohort studies. *BMJ* 2014; **349**: g4490.
- 5 Du H, Li L, Bennett D, Guo Y, Key TJ, Bian Z *et al*. Fresh fruit consumption and major cardiovascular disease in China. *N Engl J Med* 2016; **374**: 1332–1343.
- 6 He FJ, Nowson CA, MacGregor GA. Fruit and vegetable consumption and stroke: meta-analysis of cohort studies. *Lancet* 2006; **367**: 320–326.
- 7 Cooper AJ, Sharp SJ, Lentjes MAH, Luben RN, Khaw K-T, Wareham NJ *et al*. A prospective study of the association between quantity and variety of fruit and vegetable intake and incident type 2 diabetes. *Diabetes Care* 2012; **35**: 1293–1300.
- 8 Bradbury KE, Appleby PN, Key TJ. Fruit, vegetable, and fiber intake in relation to cancer risk: findings from the European Prospective Investigation into Cancer and Nutrition (EPIC). *Am J Clin Nutr* 2014; **100 Suppl 1**: 394S–8S.
- 9 Alinia S, Hels O, Tetens I. The potential association between fruit intake and body weight--a review. *Obes Rev* 2009; **10**: 639–647.
- 10 Ledoux TA, Hingle MD, Baranowski T. Relationship of fruit and vegetable intake with adiposity: a systematic review. *Obes Rev* 2011; **12**: e143-150.
- 11 Mytton OT, Nnoaham K, Eyles H, Scarborough P, Ni Mhurchu C. Systematic review and meta-analysis of the effect of increased vegetable and fruit consumption on body weight and energy intake. *BMC Public Health* 2014; **14**: 886.
- 12 Schwingshackl L, Hoffmann G, Kalle-Uhlmann T, Arregui M, Buijsse B, Boeing H. Fruit and vegetable consumption and changes in anthropometric variables in adult populations: a systematic review and meta-analysis of prospective cohort studies. *PloS One* 2015; **10**: e0140846.
- 13 Kaiser KA, Brown AW, Bohan Brown MM, Shikany JM, Mattes RD, Allison DB. Increased fruit and vegetable intake has no discernible effect on weight loss: a systematic review and meta-analysis. *Am J Clin Nutr* 2014; **100**: 567–576.

- 14 Drapeau V, Després J-P, Bouchard C, Allard L, Fournier G, Leblanc C *et al*. Modifications in food-group consumption are related to long-term body-weight changes. *Am J Clin Nutr* 2004; **80**: 29–37.
- 15 Rautiainen S, Wang L, Lee I-M, Manson JE, Buring JE, Sesso HD. Higher intake of fruit, but not vegetables or fiber, at baseline is associated with lower risk of becoming overweight or obese in middle-aged and older women of normal BMI at baseline. *J Nutr* 2015; **145**: 960–968.
- 16 Willett W. *Nutritional epidemiology*. Oxford University Press: New York, 1998.
- 17 Borugian MJ, Robson P, Fortier I, Parker L, McLaughlin J, Knoppers BM *et al*. The Canadian Partnership for Tomorrow Project: building a pan-Canadian research platform for disease prevention. *CMAJ* 2010; **182**: 1197–1201.
- 18 Yu ZM, Parker L, Dummer TJB. Depressive symptoms, diet quality, physical activity, and body composition among populations in Nova Scotia, Canada: report from the Atlantic Partnership for Tomorrow’s Health. *Prev Med* 2014; **61**: 106–113.
- 19 Craig CL, Marshall AL, Sjöström M, Bauman AE, Booth ML, Ainsworth BE *et al*. International physical activity questionnaire: 12-country reliability and validity. *Med Sci Sports Exerc* 2003; **35**: 1381–1395.
- 20 IPAQ scoring protocol - International Physical Activity Questionnaire. <https://sites.google.com/site/theipaq/scoring-protocol> (accessed 28 Oct2016).
- 21 Pahor M, Chrischilles EA, Guralnik JM, Brown SL, Wallace RB, Carbonin P. Drug data coding and analysis in epidemiologic studies. *Eur J Epidemiol* 1994; **10**: 405–411.
- 22 Grundy SM, Cleeman JI, Daniels SR, Donato KA, Eckel RH, Franklin BA *et al*. Diagnosis and management of the metabolic syndrome: an American Heart Association/National Heart, Lung, and Blood Institute Scientific Statement. *Circulation* 2005; **112**: 2735–2752.
- 23 Desquilbet L, Mariotti F. Dose-response analyses using restricted cubic spline functions in public health research. *Stat Med* 2010; **29**: 1037–1057.
- 24 Black JL, Billette J-M. Do Canadians meet Canada’s Food Guide’s recommendations for fruits and vegetables? *Appl Physiol Nutr Metab* 2013; **38**: 234–242.
- 25 Boeing H, Bechthold A, Bub A, Ellinger S, Haller D, Kroke A *et al*. Critical review: vegetables and fruit in the prevention of chronic diseases. *Eur J Nutr* 2012; **51**: 637–663.
- 26 de Oliveira MC, Sichieri R, Venturim Mozzer R. A low-energy-dense diet adding fruit reduces weight and energy intake in women. *Appetite* 2008; **51**: 291–295.
- 27 Howarth NC, Saltzman E, Roberts SB. Dietary fiber and weight regulation. *Nutr Rev* 2001; **59**: 129–139.

- 1  
2  
3 28 Liu RH. Potential synergy of phytochemicals in cancer prevention: mechanism of action. *J*  
4 *Nutr* 2004; **134**: 3479S–3485S.  
5  
6  
7 29 Shi Z, Yuan B, Hu G, Dai Y, Zuo H, Holmboe-Ottesen G. Dietary pattern and weight change  
8 in a 5-year follow-up among Chinese adults: results from the Jiangsu Nutrition Study. *Br J*  
9 *Nutr* 2011; **105**: 1047–1054.  
10  
11 30 Satija A, Bhupathiraju SN, Rimm EB, Spiegelman D, Chiuve SE, Borgi L *et al*. Plant-based  
12 dietary patterns and incidence of type 2 diabetes in US men and women: results from three  
13 prospective cohort studies. *PLoS Med* 2016; **13**: e1002039.  
14  
15 31 Borch D, Juul-Hindsgaul N, Veller M, Astrup A, Jaskolowski J, Raben A. Potatoes and risk  
16 of obesity, type 2 diabetes, and cardiovascular disease in apparently healthy adults: a  
17 systematic review of clinical intervention and observational studies. *Am J Clin Nutr* 2016;  
18 **104**: 489–498.  
19  
20  
21  
22  
23  
24  
25  
26  
27  
28  
29  
30  
31  
32  
33  
34  
35  
36  
37  
38  
39  
40  
41  
42  
43  
44  
45  
46  
47  
48  
49  
50  
51  
52  
53  
54  
55  
56  
57  
58  
59  
60

### Figure legends

Figure 1. Restricted cubic spline plots of the associations between daily fruit intake with body mass index (A), waist circumference (B), percentage fat mass (C), and fat mass index (D) among populations in Atlantic Canada<sup>a</sup>.

Solid lines denote  $\beta$  coefficients of BMI (A), waist circumference (B), percentage fat mass (C), and FMI (D); dashed lines denote 95% CIs.

<sup>a</sup>Adjusted for age, sex, province, ethnicity, education, marital status, smoking, alcohol use, physical activity, chronic disease, and intake of vegetable and fruit or vegetable juice.

Figure 2. Odds ratios (95% confidence intervals) for obesity and abdominal obesity after replacing one standard deviation of fruit and fruit or vegetable juice <sup>a</sup>.

<sup>a</sup>Adjusted for age, sex, province, ethnicity, education, marital status, smoking, alcohol use, physical activity, and chronic disease.

**Table 1. Characteristics of study participants\***

| Characteristics                                                          | n    | Men<br>(n=7979) | n     | Women<br>(n=18361) |
|--------------------------------------------------------------------------|------|-----------------|-------|--------------------|
| <b>Age, year</b>                                                         |      | 54.0 (9.3)      |       | 52.6 (9.0)         |
| <b>Total fruit and vegetable, serving/day</b>                            |      | 4.9 (2.7)       |       | 5.6 (2.6)          |
| <b>Vegetable, serving/day</b>                                            |      | 2.1 (1.4)       |       | 2.7 (1.5)          |
| <b>Fruit, serving/day</b>                                                |      | 1.8 (1.4)       |       | 2.3 (1.3)          |
| <b>100% fruit or vegetable juice, serving/day</b>                        |      | 0.9 (1.1)       |       | 0.6 (0.9)          |
| <b>Total fruit and vegetable <math>\geq 7</math> servings/day, n (%)</b> |      | 1750 (21.9)     |       | 5803 (31.6)        |
| <b>Body weight, kg</b>                                                   |      | 85.0 (17.8)     |       | 76.7 (17.8)        |
| <b>Body height, cm</b>                                                   |      | 171.8 (8.4)     |       | 164.4 (6.7)        |
| <b>Body mass index, kg/m<sup>2</sup></b>                                 |      | 28.7 (5.6)      |       | 28.4 (6.3)         |
| <b>Waist circumference, cm</b>                                           |      | 97.0 (14.0)     |       | 92.7 (15.0)        |
| <b>Hip circumference, cm</b>                                             |      | 104.7 (10.7)    |       | 106.1 (12.8)       |
| <b>Waist-to-hip ratio</b>                                                |      | 0.93 (0.10)     |       | 0.87 (0.09)        |
| <b>Percentage fat mass, %</b>                                            | 5311 | 30.8 (9.4)      | 13005 | 34.7 (8.8)         |
| <b>Fat mass index, kg/m<sup>2</sup></b>                                  | 5307 | 9.1 (4.3)       | 12997 | 10.1 (4.4)         |
| <b>Fat free mass index, kg/m<sup>2</sup></b>                             | 5306 | 19.4 (3.2)      | 12996 | 18.0 (3.1)         |
| <b>Province, n (%)</b>                                                   |      |                 |       |                    |
| Nova Scotia                                                              |      | 4272 (53.5)     |       | 9639 (52.5)        |
| New Brunswick                                                            |      | 2283 (28.6)     |       | 5424 (29.5)        |
| Newfoundland and Labrador                                                |      | 1194 (15.0)     |       | 2630 (14.3)        |
| Prince Edward Island                                                     |      | 230 (2.9)       |       | 668 (3.6)          |
| <b>Ethnicity, n (%)</b>                                                  |      |                 |       |                    |
| White                                                                    |      | 7178 (90.0)     |       | 16016 (87.2)       |
| Non-white                                                                |      | 447 (5.6)       |       | 1218 (6.6)         |
| DNK/PNA                                                                  |      | 354 (4.4)       |       | 1127 (6.1)         |
| <b>Education, n (%)</b>                                                  |      |                 |       |                    |
| Less than high school                                                    |      | 1550 (19.4)     |       | 3293 (17.9)        |
| College level                                                            |      | 2978 (37.3)     |       | 7799 (42.5)        |
| University level or higher                                               |      | 3430 (43.0)     |       | 7217 (39.3)        |
| DNK/PNA                                                                  |      | 21 (0.3)        |       | 52 (0.3)           |
| <b>Marital status, n (%)</b>                                             |      |                 |       |                    |
| Married or living together                                               |      | 6971 (87.4)     |       | 14120 (76.9)       |
| Single, divorced, separated, or widowed                                  |      | 988 (12.4)      |       | 4185 (22.8)        |
| DNK/PNA                                                                  |      | 20 (0.3)        |       | 56 (0.3)           |
| <b>Smoking status, n (%)</b>                                             |      |                 |       |                    |
| Never                                                                    |      | 3796 (47.6)     |       | 9461 (51.5)        |
| Former                                                                   |      | 3381 (42.4)     |       | 7023 (38.2)        |
| Current                                                                  |      | 763 (9.6)       |       | 1719 (9.4)         |
| DNK/PNA                                                                  |      | 39 (0.5)        |       | 158 (0.9)          |
| <b>Alcohol drinking, n (%)</b>                                           |      |                 |       |                    |
| Abstainer                                                                |      | 810 (10.2)      |       | 1985 (10.8)        |
| Occasional drinker                                                       |      | 2322 (29.1)     |       | 8489 (46.2)        |
| Regular drinker                                                          |      | 2793 (35.0)     |       | 5224 (28.5)        |
| Habitual drinker                                                         |      | 1833 (23.0)     |       | 2412 (13.1)        |
| DNK/PNA                                                                  |      | 221 (2.8)       |       | 251 (1.4)          |
| <b>Total physical activity, n (%)</b>                                    |      |                 |       |                    |
| Low                                                                      |      | 2615 (32.8)     |       | 6032 (32.9)        |
| Medium                                                                   |      | 2725 (34.2)     |       | 6144 (33.5)        |
| High                                                                     |      | 2628 (33.0)     |       | 6162 (33.6)        |
| <b>Chronic disease<sup>†</sup>, yes, n (%)</b>                           |      | 2618 (32.8)     |       | 4767 (26.0)        |

|                                                  |             |              |
|--------------------------------------------------|-------------|--------------|
| <b>Obesity<sup>‡</sup>, yes, n (%)</b>           | 2774 (34.8) | 6144 (33.5)  |
| <b>Abdominal obesity<sup>§</sup>, yes, n (%)</b> | 2590 (32.5) | 10951 (59.6) |

DNK/PNA, do not know or prefer not to answer.

\* Data are means (standard deviation) and number of participants (percentage). Percentages may not total 100 due to rounding.

<sup>†</sup> Self-reported diabetes mellitus and/or current use of antidiabetic medications, self-reported cardiovascular disease and/or current use of medications for cardiovascular disease treatment, and self-reported cancer.

<sup>‡</sup> BMI  $\geq$  30 kg/m<sup>2</sup>.

<sup>§</sup> Waist circumference  $\geq$  102 cm for men and  $\geq$  88 cm for women.

For peer review only

1  
2  
3  
4  
5  
6  
7  
8  
9  
10  
11  
12  
13  
14  
15  
16  
17  
18  
19  
20  
21  
22  
23  
24  
25  
26  
27  
28  
29  
30  
31  
32  
33  
34  
35  
36  
37  
38  
39  
40  
41  
42  
43  
44  
45  
46  
47

**Table 2. Associations between one standard deviation increment of fruit and vegetable intake with adiposity measurements**

|                                                                  | <b>β (95% CI)</b> |                |                            |                |                            |                |                       |                |
|------------------------------------------------------------------|-------------------|----------------|----------------------------|----------------|----------------------------|----------------|-----------------------|----------------|
|                                                                  | <b>BMI</b>        |                | <b>Waist circumference</b> |                | <b>Percentage fat mass</b> |                | <b>Fat mass index</b> |                |
| <b>Total fruit and vegetable</b>                                 |                   |                |                            |                |                            |                |                       |                |
| Simple model*                                                    | -0.18             | (-0.25, -0.12) | -0.67                      | (-0.85, -0.50) | -0.36                      | (-0.49, -0.23) | -0.16                 | (-0.21, -0.10) |
| Multivariable model†                                             | -0.12             | (-0.19, -0.05) | -0.40                      | (-0.58, -0.23) | -0.30                      | (-0.44, -0.17) | -0.14                 | (-0.19, -0.08) |
| <b>Vegetable</b>                                                 |                   |                |                            |                |                            |                |                       |                |
| Simple model*                                                    | -0.11             | (-0.18, -0.05) | -0.52                      | (-0.70, -0.35) | -0.25                      | (-0.38, -0.11) | -0.11                 | (-0.16, -0.05) |
| Multivariable model†                                             | -0.05             | (-0.11, 0.02)  | -0.25                      | (-0.43, -0.08) | -0.18                      | (-0.31, -0.04) | -0.08                 | (-0.14, -0.03) |
| Additional adjustment for fruit and fruit or vegetable juice     | -0.01             | (-0.08, 0.06)  | -0.13                      | (-0.32, 0.06)  | -0.06                      | (-0.21, 0.08)  | -0.03                 | (-0.10, 0.03)  |
| <b>Fruit</b>                                                     |                   |                |                            |                |                            |                |                       |                |
| Simple model*                                                    | -0.14             | (-0.21, -0.08) | -0.57                      | (-0.74, -0.39) | -0.35                      | (-0.48, -0.21) | -0.15                 | (-0.21, -0.10) |
| Multivariable model†                                             | -0.09             | (-0.16, -0.03) | -0.36                      | (-0.53, -0.18) | -0.31                      | (-0.44, -0.17) | -0.14                 | (-0.19, -0.08) |
| Additional adjustment for vegetable and fruit or vegetable juice | -0.08             | (-0.15, -0.01) | -0.29                      | (-0.48, -0.10) | -0.27                      | (-0.42, -0.13) | -0.12                 | (-0.18, -0.06) |
| <b>Fruit or vegetable juice</b>                                  |                   |                |                            |                |                            |                |                       |                |
| Simple model*                                                    | -0.13             | (-0.19, -0.06) | -0.25                      | (-0.42, -0.07) | -0.13                      | (-0.26, 0.01)  | -0.06                 | (-0.11, -0.00) |
| Multivariable model†                                             | -0.12             | (-0.18, -0.05) | -0.20                      | (-0.37, -0.03) | -0.11                      | (-0.25, 0.02)  | -0.05                 | (-0.10, 0.01)  |
| Additional adjustment for vegetable and fruit                    | -0.11             | (-0.18, -0.05) | -0.17                      | (-0.35, 0.00)  | -0.09                      | (-0.22, 0.04)  | -0.04                 | (-0.09, 0.02)  |

BMI, body mass index; CI, confidence interval

\* Adjusted for age, sex, and province.

† Adjusted for age, sex, province, ethnicity, education, marital status, smoking, alcohol use, physical activity, and chronic disease.

**Table 3. Associations of fruit and vegetable intake with obesity and abdominal obesity**

|                                                                  | Levels of fruit and vegetable intake, OR (95% CI) |                       |                   | <i>P</i> for trend |
|------------------------------------------------------------------|---------------------------------------------------|-----------------------|-------------------|--------------------|
|                                                                  | Low                                               | Medium                | High              |                    |
| <b>Obesity</b>                                                   |                                                   |                       |                   |                    |
| <b>Total fruit and vegetable</b>                                 | < 4 servings/day                                  | ≥ 4, < 6 servings/day | ≥ 6 servings/day  |                    |
| Case/n                                                           | 3714/10308                                        | 2732/8377             | 2472/7655         |                    |
| Simple model*                                                    | 1.0 (Reference)                                   | 0.90 (0.84, 0.95)     | 0.88 (0.82, 0.94) | <0.001             |
| Multivariable model†                                             | 1.0 (Reference)                                   | 0.95 (0.89, 1.01)     | 0.95 (0.89, 1.02) | 0.150              |
| <b>Vegetable</b>                                                 | < 2 servings/day                                  | ≥ 2, < 3 servings/day | ≥ 3 servings/day  |                    |
| Case/n                                                           | 2451/6821                                         | 2654/7968             | 3813/11551        |                    |
| Simple model*                                                    | 1.0 (Reference)                                   | 0.92 (0.85, 0.98)     | 0.94 (0.88, 1.00) | 0.090              |
| Multivariable model†                                             | 1.0 (Reference)                                   | 0.97 (0.91, 1.04)     | 1.05 (0.98, 1.12) | 0.106              |
| Additional adjustment for fruit and fruit or vegetable juice     | 1.0 (Reference)                                   | 1.01 (0.93, 1.08)     | 1.11 (1.03, 1.19) | 0.004              |
| <b>Fruit</b>                                                     | < 1 servings/day                                  | ≥ 1, < 2 servings/day | ≥ 2 servings/day  |                    |
| Case/n                                                           | 3226/8936                                         | 2870/8651             | 2822/8753         |                    |
| Simple model*                                                    | 1.0 (Reference)                                   | 0.90 (0.84, 0.95)     | 0.86 (0.80, 0.91) | <0.001             |
| Multivariable model†                                             | 1.0 (Reference)                                   | 0.92 (0.86, 0.98)     | 0.90 (0.84, 0.96) | 0.003              |
| Additional adjustment for vegetable and fruit or vegetable juice | 1.0 (Reference)                                   | 0.91 (0.85, 0.97)     | 0.87 (0.81, 0.93) | <0.001             |
| <b>Fruit or vegetable juice</b>                                  | <b>No</b>                                         | <b>Yes</b>            | <b><i>P</i></b>   |                    |
| Case/n                                                           | 4524/12816                                        | 4394/13524            |                   |                    |
| Simple model*                                                    | 1.0 (Reference)                                   | 0.88 (0.84, 0.93)     | <0.001            |                    |
| Multivariable model†                                             | 1.0 (Reference)                                   | 0.90 (0.86, 0.95)     | <0.001            |                    |
| Additional adjustment for vegetable and fruit                    | 1.0 (Reference)                                   | 0.91 (0.86, 0.96)     | <0.001            |                    |
| <b>Abdominal obesity</b>                                         |                                                   |                       |                   |                    |
| <b>Total fruit and vegetable</b>                                 | < 4 servings/day                                  | ≥ 4, < 6 servings/day | ≥ 6 servings/day  |                    |
| Case/n                                                           | 5307/10308                                        | 4348/8377             | 3886/7655         |                    |
| Simple model*                                                    | 1.0 (Reference)                                   | 0.88 (0.83, 0.93)     | 0.80 (0.76, 0.86) | <0.001             |
| Multivariable model†                                             | 1.0 (Reference)                                   | 0.94 (0.88, 1.00)     | 0.88 (0.83, 0.94) | <0.001             |
| <b>Vegetable</b>                                                 | < 2 servings/day                                  | ≥ 2, < 3 servings/day | ≥ 3 servings/day  |                    |
| Case/n                                                           | 3390/6821                                         | 4138/7968             | 6013/11551        |                    |
| Simple model*                                                    | 1.0 (Reference)                                   | 0.93 (0.87, 0.99)     | 0.84 (0.79, 0.89) | <0.001             |
| Multivariable model†                                             | 1.0 (Reference)                                   | 0.99 (0.92, 1.06)     | 0.94 (0.88, 1.01) | 0.066              |
| Additional adjustment for fruit and fruit or vegetable juice     | 1.0 (Reference)                                   | 1.01 (0.94, 1.09)     | 0.99 (0.92, 1.06) | 0.603              |
| <b>Fruit</b>                                                     | < 1 servings/day                                  | ≥ 1, < 2 servings/day | ≥ 2 servings/day  |                    |
| Case/n                                                           | 4479/8936                                         | 4562/8651             | 4500/8753         |                    |
| Simple model*                                                    | 1.0 (Reference)                                   | 0.93 (0.88, 0.99)     | 0.82 (0.77, 0.88) | <0.001             |



1  
2  
3  
4  
5  
6  
7  
8  
9  
10  
11  
12  
13  
14  
15  
16  
17  
18  
19  
20  
21  
22  
23  
24  
25  
26  
27  
28  
29  
30  
31  
32  
33  
34  
35  
36  
37  
38  
39  
40  
41  
42  
43  
44  
45  
46  
47

|                                                                  |                 |                   |                   |        |
|------------------------------------------------------------------|-----------------|-------------------|-------------------|--------|
| Multivariable model <sup>†</sup>                                 | 1.0 (Reference) | 0.97 (0.91, 1.03) | 0.88 (0.82, 0.94) | <0.001 |
| Additional adjustment for vegetable and fruit or vegetable juice | 1.0 (Reference) | 0.97 (0.91, 1.04) | 0.88 (0.82, 0.94) | <0.001 |
| <b>Fruit or vegetable juice</b>                                  | <b>No</b>       | <b>Yes</b>        | <b>P</b>          |        |
| Case/n                                                           | 6972/12816      | 6569/13524        |                   |        |
| Simple model*                                                    | 1.0 (Reference) | 0.90 (0.85, 0.95) |                   | <0.001 |
| Multivariable model <sup>†</sup>                                 | 1.0 (Reference) | 0.93 (0.88, 0.98) |                   | 0.005  |
| Additional adjustment for vegetable and fruit                    | 1.0 (Reference) | 0.93 (0.88, 0.98) |                   | 0.004  |

CI, confidence interval; OR, odds ratio.  
 \* Adjusted for age, sex, and province.  
 † Adjusted for age, sex, province, ethnicity, education, marital status, smoking, alcohol use, physical activity, and chronic disease.

For peer review only

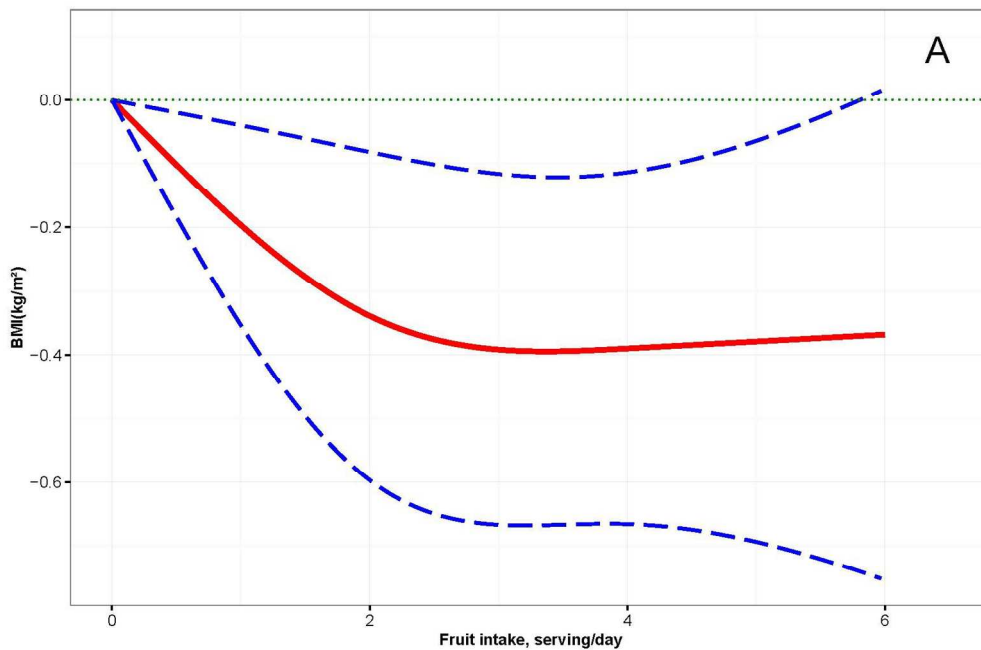

222x146mm (200 x 200 DPI)

view only

1  
2  
3  
4  
5  
6  
7  
8  
9  
10  
11  
12  
13  
14  
15  
16  
17  
18  
19  
20  
21  
22  
23  
24  
25  
26  
27  
28  
29  
30  
31  
32  
33  
34  
35  
36  
37  
38  
39  
40  
41  
42  
43  
44  
45  
46  
47  
48  
49  
50  
51  
52  
53  
54  
55  
56  
57  
58  
59  
60

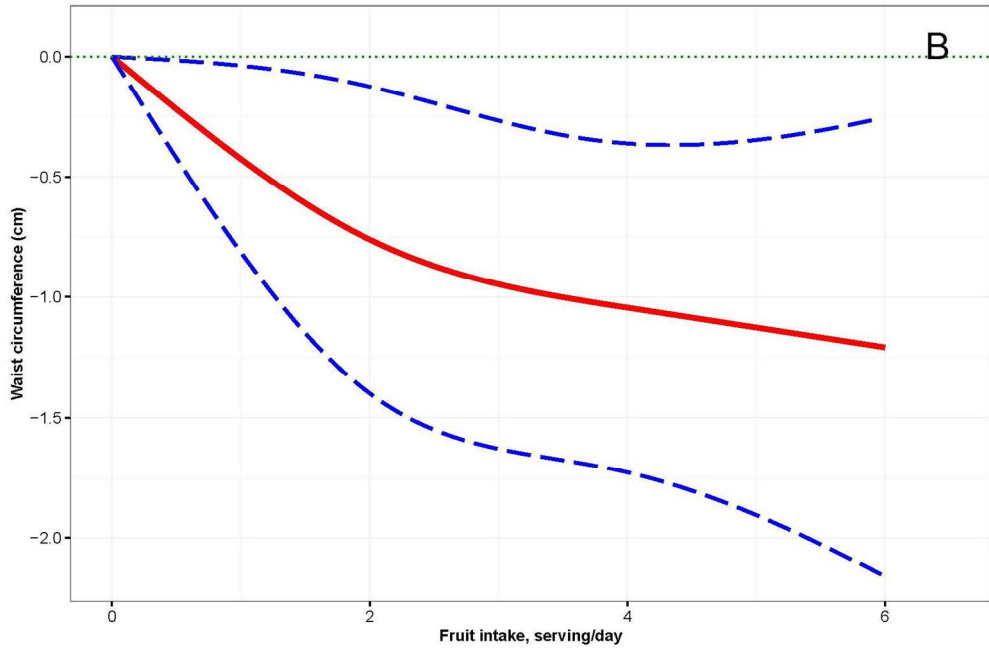

222x146mm (200 x 200 DPI)

view only

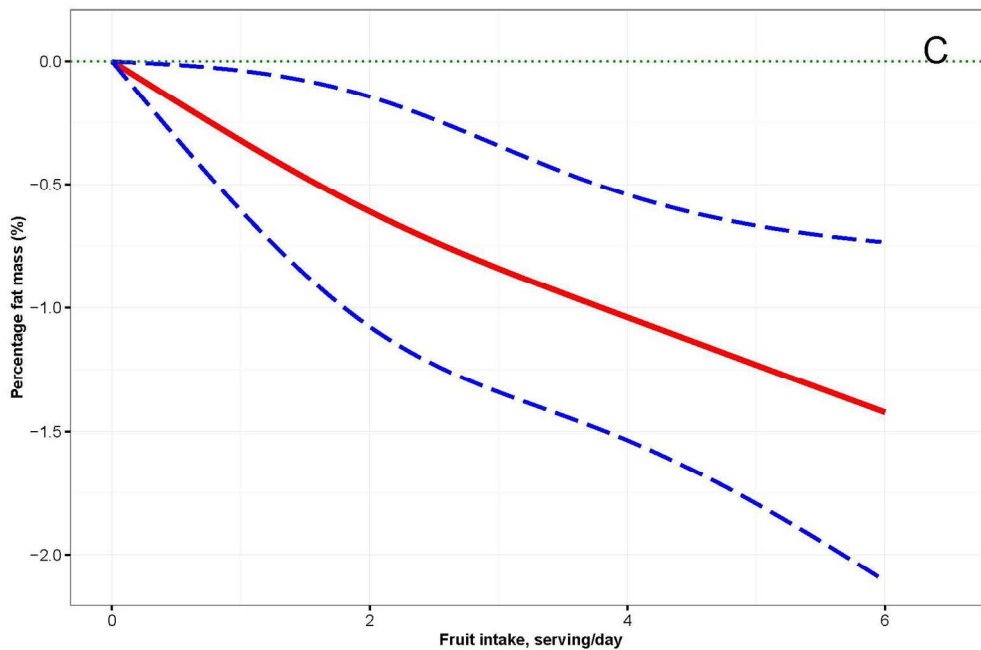

222x146mm (200 x 200 DPI)

view only

1  
2  
3  
4  
5  
6  
7  
8  
9  
10  
11  
12  
13  
14  
15  
16  
17  
18  
19  
20  
21  
22  
23  
24  
25  
26  
27  
28  
29  
30  
31  
32  
33  
34  
35  
36  
37  
38  
39  
40  
41  
42  
43  
44  
45  
46  
47  
48  
49  
50  
51  
52  
53  
54  
55  
56  
57  
58  
59  
60

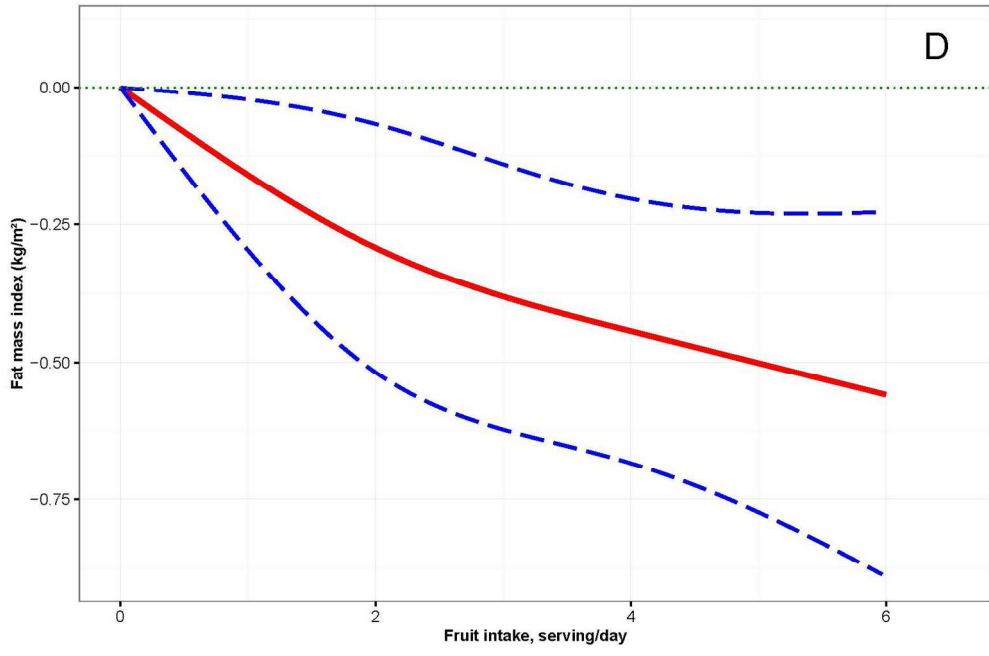

222x146mm (200 x 200 DPI)

view only

1  
2  
3  
4  
5  
6  
7  
8  
9  
10  
11  
12  
13  
14  
15  
16  
17  
18  
19  
20  
21  
22  
23  
24  
25  
26  
27  
28  
29  
30  
31  
32  
33  
34  
35  
36  
37  
38  
39  
40  
41  
42  
43  
44  
45  
46  
47  
48  
49  
50  
51  
52  
53  
54  
55  
56  
57  
58  
59  
60

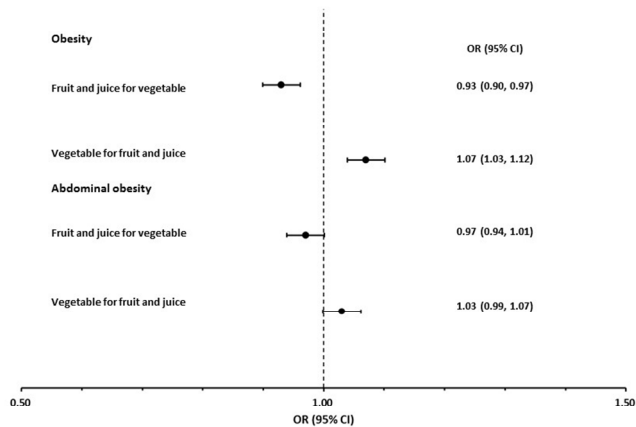

338x190mm (96 x 96 DPI)

Review only

1  
2  
3 ***Supplementary materials***  
4  
5  
6

7 **Fruit and Vegetable Intake and Body Adiposity among Populations in Eastern Canada: the**  
8  
9 **Atlantic Partnership for Tomorrow's Health Study**  
10  
11

12  
13 Zhijie M. Yu<sup>1</sup>, Vanessa DeClercq<sup>1</sup>, Yunsong Cui<sup>1</sup>, Cynthia Forbes<sup>1,2</sup>, Scott Grandy<sup>2</sup>, Melanie Keats<sup>2</sup>,  
14  
15 Louise Parker<sup>1</sup>, Ellen Sweeney<sup>1</sup>, Trevor J.B. Dummer<sup>3</sup>  
16  
17

18  
19  
20 <sup>1</sup>Population Cancer Research Program, Department of Pediatrics, Dalhousie University, Halifax, NS,  
21  
22 Canada  
23

24 <sup>2</sup>School of Health and Human Performance, Dalhousie University, Halifax, NS, Canada  
25

26 <sup>3</sup>Center of Excellence in Cancer Prevention, School of Prevention and Public Health, University of British  
27  
28 Columbia, Vancouver, BC, Canada  
29  
30

**Supplementary Table 1. Mean intakes of fruit and vegetable and correlation between vegetable and fruit and body adiposity measurements**

|                               | n     | Total fruit and vegetable                        |          | Vegetable |          | Fruit     |          | 100% fruit or vegetable juice |          |
|-------------------------------|-------|--------------------------------------------------|----------|-----------|----------|-----------|----------|-------------------------------|----------|
| Mean intake (SD), serving/day | 26340 | 5.4 (2.6)                                        |          | 2.5 (1.5) |          | 2.1 (1.3) |          | 0.7 (1.0)                     |          |
|                               |       | <i>Pearson partial correlation coefficients*</i> |          |           |          |           |          |                               |          |
| <b>Correlation</b>            |       | <b>r</b>                                         | <b>P</b> | <b>r</b>  | <b>P</b> | <b>r</b>  | <b>P</b> | <b>r</b>                      | <b>P</b> |
| Vegetable                     | 26340 | 0.79                                             | <0.001   | -         | -        | -         | -        | -                             | -        |
| Fruit                         | 26340 | 0.77                                             | <0.001   | 0.41      | <0.001   | -         | -        | -                             | -        |
| 100% fruit or vegetable juice | 26340 | 0.43                                             | <0.001   | 0.03      | <0.001   | 0.08      | <0.001   | -                             | -        |
| Body mass index               | 26340 | -0.03                                            | <0.001   | -0.03     | <0.001   | -0.02     | <0.001   | -0.02                         | 0.001    |
| Waist circumference           | 26340 | -0.04                                            | <0.001   | -0.03     | <0.001   | -0.04     | <0.001   | -0.01                         | 0.022    |
| Waist-to-hip ratio            | 26340 | -0.04                                            | <0.001   | -0.03     | <0.001   | -0.03     | <0.001   | -0.01                         | 0.348    |
| Percentage fat mass           | 18316 | -0.04                                            | <0.001   | -0.03     | <0.001   | -0.03     | <0.001   | -0.01                         | 0.066    |
| Fat mass index                | 18304 | -0.03                                            | <0.001   | -0.02     | 0.005    | -0.02     | 0.002    | -0.02                         | 0.030    |
| Fat free mass index           | 18302 | 0.00                                             | 0.693    | 0.00      | 0.916    | 0.01      | 0.112    | -0.01                         | 0.198    |

\* Adjusted for age and sex.



**Supplementary Table 2. Odds ratios for obesity and abdominal obesity by alternatively replacing one standard deviation of intakes of vegetable, fruit, and 100% fruit or vegetable juice**

| Model                      | Obesity, OR (95% CI) |              | Abdominal obesity, OR (95% CI) |              |
|----------------------------|----------------------|--------------|--------------------------------|--------------|
| <b>Fruit for vegetable</b> |                      |              |                                |              |
| Simple model*              | 0.95                 | (0.91, 1.00) | 0.98                           | (0.93, 1.03) |
| Multivariable model†       | 0.92                 | (0.88, 0.97) | 0.95                           | (0.91, 1.00) |
| <b>Fruit for juice</b>     |                      |              |                                |              |
| Simple model*              | 0.99                 | (0.95, 1.03) | 0.96                           | (0.93, 1.00) |
| Multivariable model†       | 0.99                 | (0.95, 1.03) | 0.97                           | (0.93, 1.01) |
| <b>Juice for vegetable</b> |                      |              |                                |              |
| Simple model*              | 0.97                 | (0.93, 1.00) | 1.02                           | (0.98, 1.05) |
| Multivariable model†       | 0.93                 | (0.90, 0.97) | 0.98                           | (0.94, 1.02) |
| <b>Juice for fruit</b>     |                      |              |                                |              |
| Simple model*              | 1.01                 | (0.97, 1.06) | 1.04                           | (1.00, 1.08) |
| Multivariable model†       | 1.01                 | (0.97, 1.05) | 1.03                           | (0.99, 1.07) |
| <b>Vegetable for fruit</b> |                      |              |                                |              |
| Simple model*              | 1.05                 | (1.00, 1.10) | 1.02                           | (0.97, 1.07) |
| Multivariable model†       | 1.08                 | (1.03, 1.14) | 1.05                           | (1.00, 1.10) |
| <b>Vegetable for juice</b> |                      |              |                                |              |
| Simple model*              | 1.04                 | (1.00, 1.08) | 0.99                           | (0.95, 1.02) |
| Multivariable model†       | 1.07                 | (1.03, 1.12) | 1.02                           | (0.98, 1.06) |

CI, confidence interval; OR, odds ratio.

\* Adjusted for age, sex, and province.

† Adjusted for age, sex, province, ethnicity, education, marital status, smoking, alcohol use, physical activity, and chronic disease.

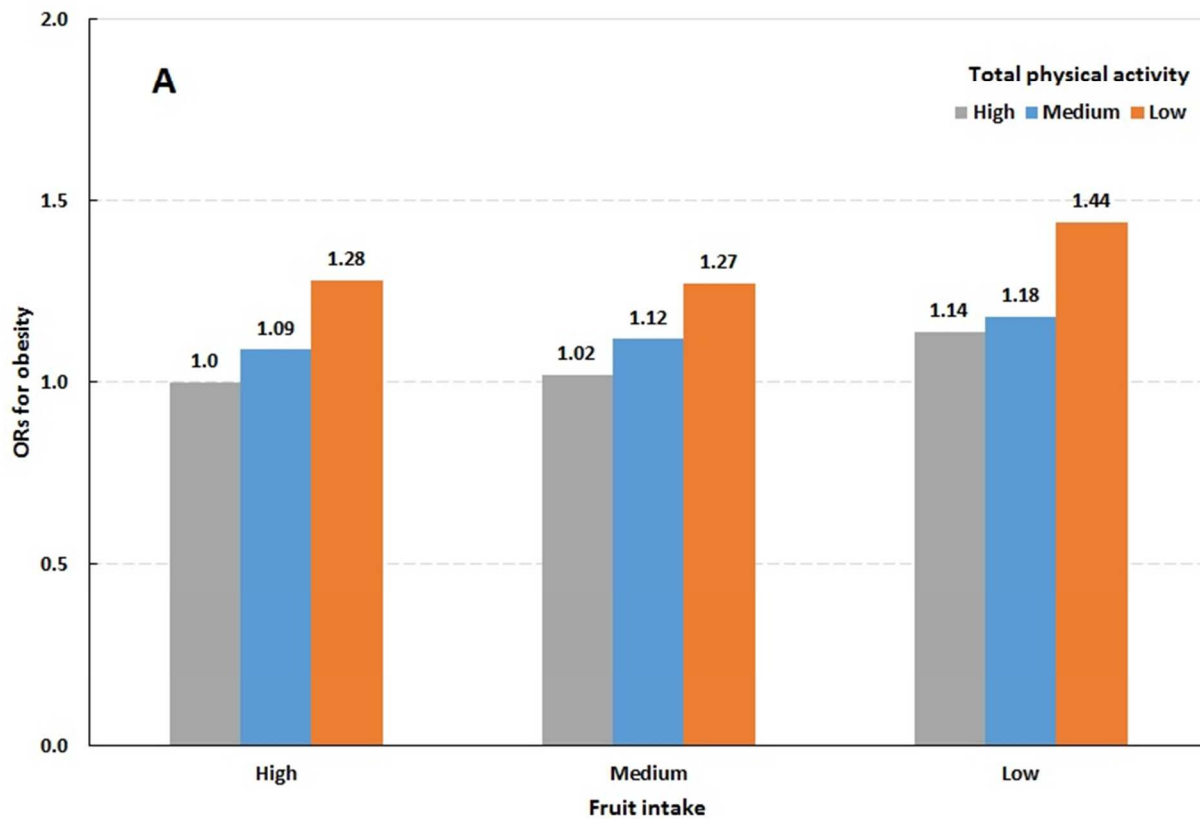

33 Supplementary Figure 1A. Joint associations of daily fruit intake and physical activity with risks of  
34 obesity<sup>a,b</sup>.

35  
36  
37 <sup>a</sup>Adjusted for age, sex, province, ethnicity, education, marital status, smoking, alcohol use, chronic  
38 disease, and intakes of vegetable and fruit or vegetable juice.

39  
40 Participants with the high levels of both fruit intake and total physical activity was the reference group.

41  
42  
43 <sup>b</sup>*P* for trend < 0.001 and *P* for interaction > 0.05.

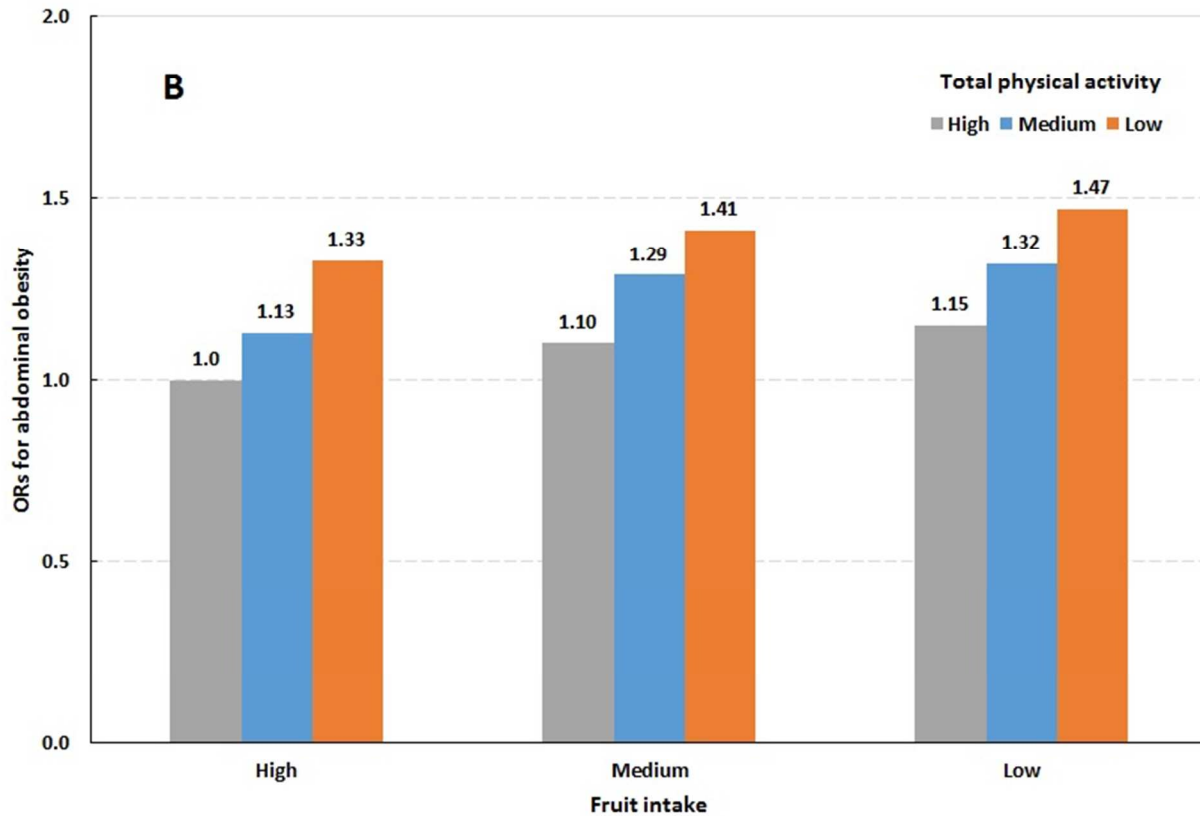

Supplementary Figure 1B. Joint associations of daily fruit intake and physical activity with risks of abdominal obesity<sup>a,b</sup>.

<sup>a</sup>Adjusted for age, sex, province, ethnicity, education, marital status, smoking, alcohol use, chronic disease, and intakes of vegetable and fruit or vegetable juice.

Participants with the high levels of both fruit intake and total physical activity was the reference group.

<sup>b</sup> $P$  for trend < 0.001 and  $P$  for interaction > 0.05.

**STROBE 2007 (v4) Statement—Checklist of items that should be included in reports of *cross-sectional studies***

| Section/Topic                | Item # | Recommendation                                                                                                                                                                       | Reported on page # |
|------------------------------|--------|--------------------------------------------------------------------------------------------------------------------------------------------------------------------------------------|--------------------|
| Title and abstract           | 1      | (a) Indicate the study's design with a commonly used term in the title or the abstract                                                                                               | 2                  |
|                              |        | (b) Provide in the abstract an informative and balanced summary of what was done and what was found                                                                                  | 2                  |
| <b>Introduction</b>          |        |                                                                                                                                                                                      |                    |
| Background/rationale         | 2      | Explain the scientific background and rationale for the investigation being reported                                                                                                 | 4                  |
| Objectives                   | 3      | State specific objectives, including any prespecified hypotheses                                                                                                                     | 4                  |
| <b>Methods</b>               |        |                                                                                                                                                                                      |                    |
| Study design                 | 4      | Present key elements of study design early in the paper                                                                                                                              | 5                  |
| Setting                      | 5      | Describe the setting, locations, and relevant dates, including periods of recruitment, exposure, follow-up, and data collection                                                      | 5                  |
| Participants                 | 6      | (a) Give the eligibility criteria, and the sources and methods of selection of participants                                                                                          | 5                  |
| Variables                    | 7      | Clearly define all outcomes, exposures, predictors, potential confounders, and effect modifiers. Give diagnostic criteria, if applicable                                             | 6, 7               |
| Data sources/<br>measurement | 8*     | For each variable of interest, give sources of data and details of methods of assessment (measurement). Describe comparability of assessment methods if there is more than one group | 6, 7               |
| Bias                         | 9      | Describe any efforts to address potential sources of bias                                                                                                                            | 9                  |
| Study size                   | 10     | Explain how the study size was arrived at                                                                                                                                            | 6                  |
| Quantitative variables       | 11     | Explain how quantitative variables were handled in the analyses. If applicable, describe which groupings were chosen and why                                                         | 8, 9               |
| Statistical methods          | 12     | (a) Describe all statistical methods, including those used to control for confounding                                                                                                | 8, 9               |
|                              |        | (b) Describe any methods used to examine subgroups and interactions                                                                                                                  | 8, 9               |
|                              |        | (c) Explain how missing data were addressed                                                                                                                                          | 6                  |
|                              |        | (d) If applicable, describe analytical methods taking account of sampling strategy                                                                                                   |                    |
|                              |        | (e) Describe any sensitivity analyses                                                                                                                                                | 9                  |
| <b>Results</b>               |        |                                                                                                                                                                                      |                    |

|                          |     |                                                                                                                                                                                                              |                                          |
|--------------------------|-----|--------------------------------------------------------------------------------------------------------------------------------------------------------------------------------------------------------------|------------------------------------------|
| Participants             | 13* | (a) Report numbers of individuals at each stage of study—eg numbers potentially eligible, examined for eligibility, confirmed eligible, included in the study, completing follow-up, and analysed            | 6                                        |
|                          |     | (b) Give reasons for non-participation at each stage                                                                                                                                                         | 6                                        |
|                          |     | (c) Consider use of a flow diagram                                                                                                                                                                           | N/A                                      |
| Descriptive data         | 14* | (a) Give characteristics of study participants (eg demographic, clinical, social) and information on exposures and potential confounders                                                                     | 9                                        |
|                          |     | (b) Indicate number of participants with missing data for each variable of interest                                                                                                                          | 6                                        |
| Outcome data             | 15* | Report numbers of outcome events or summary measures                                                                                                                                                         | Tables 1 and 3 and Supplementary Table 1 |
| Main results             | 16  | (a) Give unadjusted estimates and, if applicable, confounder-adjusted estimates and their precision (eg, 95% confidence interval). Make clear which confounders were adjusted for and why they were included | All tables                               |
|                          |     | (b) Report category boundaries when continuous variables were categorized                                                                                                                                    | Table 3                                  |
|                          |     | (c) If relevant, consider translating estimates of relative risk into absolute risk for a meaningful time period                                                                                             |                                          |
| Other analyses           | 17  | Report other analyses done—eg analyses of subgroups and interactions, and sensitivity analyses                                                                                                               | 9, Supplementary Table 3 and Figure 1    |
| <b>Discussion</b>        |     |                                                                                                                                                                                                              |                                          |
| Key results              | 18  | Summarise key results with reference to study objectives                                                                                                                                                     | 10                                       |
| Limitations              | 19  | Discuss limitations of the study, taking into account sources of potential bias or imprecision. Discuss both direction and magnitude of any potential bias                                                   | 12                                       |
| Interpretation           | 20  | Give a cautious overall interpretation of results considering objectives, limitations, multiplicity of analyses, results from similar studies, and other relevant evidence                                   | 11-12                                    |
| Generalisability         | 21  | Discuss the generalisability (external validity) of the study results                                                                                                                                        | 12                                       |
| <b>Other information</b> |     |                                                                                                                                                                                                              |                                          |
| Funding                  | 22  | Give the source of funding and the role of the funders for the present study and, if applicable, for the original study on which the present article is based                                                | 14                                       |

\*Give information separately for cases and controls in case-control studies and, if applicable, for exposed and unexposed groups in cohort and cross-sectional studies.

1  
2  
3  
4 **Note:** An Explanation and Elaboration article discusses each checklist item and gives methodological background and published examples of transparent reporting. The STROBE  
5 checklist is best used in conjunction with this article (freely available on the Web sites of PLoS Medicine at <http://www.plosmedicine.org/>, Annals of Internal Medicine at  
6 <http://www.annals.org/>, and Epidemiology at <http://www.epidem.com/>). Information on the STROBE Initiative is available at [www.strobe-statement.org](http://www.strobe-statement.org).  
7  
8  
9  
10  
11  
12  
13  
14  
15  
16  
17  
18  
19  
20  
21  
22  
23  
24  
25  
26  
27  
28  
29  
30  
31  
32  
33  
34  
35  
36  
37  
38  
39  
40  
41  
42  
43  
44  
45  
46  
47

For peer review only

# BMJ Open

## Fruit and Vegetable Intake and Body Adiposity among Populations in Eastern Canada: the Atlantic Partnership for Tomorrow's Health Study

|                                 |                                                                                                                                                                                                                                                                                                                                                                                                                                                                                                                                                                 |
|---------------------------------|-----------------------------------------------------------------------------------------------------------------------------------------------------------------------------------------------------------------------------------------------------------------------------------------------------------------------------------------------------------------------------------------------------------------------------------------------------------------------------------------------------------------------------------------------------------------|
| Journal:                        | <i>BMJ Open</i>                                                                                                                                                                                                                                                                                                                                                                                                                                                                                                                                                 |
| Manuscript ID                   | bmjopen-2017-018060.R1                                                                                                                                                                                                                                                                                                                                                                                                                                                                                                                                          |
| Article Type:                   | Research                                                                                                                                                                                                                                                                                                                                                                                                                                                                                                                                                        |
| Date Submitted by the Author:   | 06-Feb-2018                                                                                                                                                                                                                                                                                                                                                                                                                                                                                                                                                     |
| Complete List of Authors:       | Yu, Zhijie; Dalhousie University, Pediatrics<br>DeClercq, Vanessa; Dalhousie University, Pediatrics<br>Cui, Yunsong; Dalhousie University, Pediatrics<br>Forbes, Cynthia; Dalhousie University, School of Health and Human Performance<br>Grandy, Scott; Dalhousie University, School of Health and Human Performance<br>Keats, Melanie; Dalhousie University, School of Health and Human Performance<br>Parker, Louise; Dalhousie University, Pediatrics<br>Sweeney, Ellen; Dalhousie University, Pediatrics<br>Dummer, Trevor; University of British Columbia |
| <b>Primary Subject Heading</b>: | Epidemiology                                                                                                                                                                                                                                                                                                                                                                                                                                                                                                                                                    |
| Secondary Subject Heading:      | Public health, Epidemiology, Nutrition and metabolism                                                                                                                                                                                                                                                                                                                                                                                                                                                                                                           |
| Keywords:                       | EPIDEMIOLOGY, NUTRITION & DIETETICS, PUBLIC HEALTH                                                                                                                                                                                                                                                                                                                                                                                                                                                                                                              |
|                                 |                                                                                                                                                                                                                                                                                                                                                                                                                                                                                                                                                                 |

SCHOLARONE™  
Manuscripts

1  
2  
3 **Fruit and Vegetable Intake and Body Adiposity among Populations in Eastern Canada: the**  
4 **Atlantic Partnership for Tomorrow's Health Study**  
5  
6  
7  
8

9 **Running title:** Fruit and Vegetable Intake and Body Adiposity  
10  
11  
12  
13  
14  
15

16 Zhijie Michael Yu<sup>1</sup>, PhD, Vanessa DeClercq<sup>1</sup>, PhD, Yunsong Cui<sup>1</sup>, MSc, Cynthia Forbes<sup>1,2</sup>, PhD, Scott  
17 Grandy<sup>2</sup>, PhD, Melanie Keats<sup>2</sup>, PhD, Louise Parker<sup>1</sup>, PhD, Ellen Sweeney<sup>1</sup>, PhD, Trevor J.B. Dummer<sup>3</sup>,  
18 PhD  
19  
20  
21  
22  
23

24 <sup>1</sup>Population Cancer Research Program, Department of Paediatrics, Dalhousie University, Halifax, NS,  
25 Canada  
26  
27

28 <sup>2</sup>School of Health and Human Performance, Dalhousie University, Halifax, NS, Canada  
29

30 <sup>3</sup>Centre of Excellence in Cancer Prevention, School of Prevention and Public Health, University of British  
31 Columbia, Vancouver, BC, Canada  
32  
33  
34  
35  
36

37 Correspondence to: Dr. Zhijie Michael Yu, Population Cancer Research Program, Department of  
38 Paediatrics, Dalhousie University, 1494 Carlton St., Halifax, NS, Canada, B3H 4R2, Tel: 902-494-3049,  
39 Fax: 902-494-2089, Email. [zhijie.yu@dal.ca](mailto:zhijie.yu@dal.ca) or [zhijie.m.yu@gmail.com](mailto:zhijie.m.yu@gmail.com)  
40  
41  
42  
43  
44

45 Word count text: 3022; abstract: 228  
46

47 Number of tables: 3; number of figures: 2;  
48

49 Number of supplementary tables: 2; number of supplementary figure: 1  
50

51 References: 32  
52  
53  
54  
55  
56  
57  
58  
59  
60



## Abstract

**Objectives:** The prevalence of obesity among populations in the Atlantic Provinces is the highest in Canada. Some studies suggest that adequate fruit and vegetable consumption may help body weight management. We assessed the associations between fruit and vegetable intake with body adiposity among individuals who participated in the baseline survey of the Atlantic Partnership for Tomorrow's Health (Atlantic PATH) cohort study.

**Methods:** We carried out a cross-sectional analysis among 26340 individuals (7979 men and 18361 women) aged 35-69 years who were recruited in the baseline survey of the Atlantic PATH study. Data on fruit and vegetable intake, sociodemographic and behavioural factors, chronic disease, anthropometric measurements, and body composition were included in the analysis.

**Results:** In the multivariable regression analyses, one standard deviation increment of total fruit and vegetable intake was inversely associated with BMI ( $-0.12 \text{ kg/m}^2$ ; 95% CI,  $-0.19, -0.05$ ), waist circumference ( $-0.40 \text{ cm}$ ; 95% CI,  $-0.58, -0.23$ ), percentage fat mass ( $-0.30 \%$ ; 95% CI,  $-0.44, -0.17$ ), and fat mass index ( $-0.14 \text{ kg/m}^2$ ; 95% CI,  $-0.19, -0.08$ ). Fruit intake, but not vegetable intake, was consistently inversely associated with anthropometric indices, fat mass, obesity, and abdominal obesity.

**Conclusions:** Fruit and vegetable consumption was inversely associated with body adiposity among the participant population in Atlantic Canada. This association was primarily attributable to fruit intake. Longitudinal studies and randomized trials are warranted to confirm these observations and investigate the underlying mechanisms.

### Strengths and limitations of this study

- Data from a large-scale population-based survey with objectively measured body composition.
- Associations between fruit and vegetable intake with body adiposity measurements were assessed in combination and separately using multivariable regression models.
- Limitations of a cross-sectional analysis with an unrepresentative sample.

For peer review only

## Introduction

The increasing prevalence of obesity, a major risk factor for a variety of chronic diseases, including coronary heart disease, stroke, diabetes mellitus, and some cancers, is a critical worldwide public health concern.<sup>1</sup> People living in Atlantic Canada have the highest prevalence of obesity (BMI  $\geq$  30 kg/m<sup>2</sup>) among the Canadian population. In 2011, the prevalence of obesity ranged from 24% in Prince Edward Island to 28% in Newfoundland and Labrador. It is predicted that the percentage of people who are overweight or obese will continue to increase.<sup>2</sup> Appropriate strategies to effectively halt the obesity epidemic among populations in this region (and other areas) are of critical public health interest.

Fruits and vegetables are important components of a healthy diet, contributing to a large proportion of an individual's daily intake of vitamins, minerals, and dietary fibre. Health Canada recommends that adults should consume 7-10 servings of a variety of fruits and vegetables per day to reduce the risks of cancer and other chronic diseases.<sup>3</sup> Further, substantial evidence has shown that increased consumption of fruits and vegetables may reduce the risks of mortality from all causes<sup>4</sup> and the development of cardiometabolic disease.<sup>5-8</sup> Interestingly, some systematic reviews have suggested that appropriately increased fruit and vegetable intake may help body weight management by preventing the development of obesity and reducing body weight over time.<sup>9-12</sup> However, one meta-analysis of interventional trials showed that increased fruit and vegetable intake had an effect on weight loss<sup>11</sup>; another study did not find an effect in terms of body weight reduction.<sup>13</sup> A Canadian study found that increased fruit intake was associated with reduced weight gain over a six-year period among participants of the Quebec Family Study.<sup>14</sup> Additionally, some studies suggest that fruit consumption might have a more favourable impact on body weight control than vegetable consumption.<sup>9,15</sup>

We hypothesize that fruit and vegetable consumption may play a role in the obesity epidemic among populations living in Atlantic Canada. The primary aims of this study were to assess: 1) the intake of fruits, vegetables, and 100% fruit or vegetable juice; and 2) associations between fruit, vegetable, and

1  
2  
3 100% fruit or vegetable juice intake with anthropometric indices and body composition among  
4  
5 participants who were enrolled in the baseline survey of the Atlantic Partnership for Tomorrow's Health  
6  
7 (Atlantic PATH) study. We further assessed how the consumption of fruit, vegetable, and 100% fruit or  
8  
9 vegetable juice were associated with body adiposity measurements by considering these three components  
10  
11 as one food group and treating them independently in the multivariable logistic regression analyses.<sup>15,16</sup>  
12  
13

## 14 15 16 **Methods**

### 17 18 ***Study population***

19  
20 The Atlantic PATH study is a part of the Canadian Partnership for Tomorrow Project (CPTP), a pan-  
21  
22 Canadian longitudinal cohort study examining the role of genetic, environmental, behavioural and  
23  
24 lifestyle factors in the development of cancer and chronic disease.<sup>17,18</sup> The Atlantic PATH study is a  
25  
26 population-based cohort in which study participants were residents of one of the four Atlantic Canadian  
27  
28 Provinces (Nova Scotia, New Brunswick, Newfoundland and Labrador, and Prince Edward Island) and  
29  
30 aged between 35 and 69 years. Study participants were recruited from the general public through a  
31  
32 combination of community outreach and awareness activities, advertising and media campaigns, and  
33  
34 invitation. During 2009 to 2015, 31173 Atlantic PATH study participants, including 9445 men and 21728  
35  
36 women, were recruited from the four Atlantic Canada provinces. The study was approved by appropriate  
37  
38 Research Ethics Boards in each province. All participants provided written informed consent prior to  
39  
40 participation. All data collection procedures followed the research protocol guidelines as approved by the  
41  
42 Research Ethics Boards.  
43  
44

45  
46  
47 We excluded 4833 participants from this analysis as a result of current pregnancy (n=40), missing data on  
48  
49 fruit, vegetable, and 100% fruit or vegetable juice (n=816), anthropometric indices (n=4127), and other  
50  
51 variables (n=90). The final analysis sample was comprised of 26340 participants (7979 men and 18361  
52  
53 women).  
54  
55  
56  
57

### ***Data collection***

Data collection procedures have been reported previously.<sup>18,19</sup> In brief, a set of standardised questionnaires on sociodemographic, health status, medication use, diet, lifestyle factors, and self-measured anthropometric indices were completed by participants. Physical measurements (including anthropometric indices and body composition) were measured by research nurses at an assessment centre.

### ***Assessment of fruit and vegetable consumption***

Consumption of fruit, vegetable, and 100% fruit or vegetable juice were assessed by using three questions: 1) In a typical day, how many servings of vegetable do you eat? One serving is about ½ cup or 125 ml of fresh, frozen, canned, or cooked vegetables. 2) In a typical day, how many servings of fruit do you eat? One serving is about ½ cup or 125 ml of fresh, frozen, or canned fruit. 3) In a typical day, how many servings of 100% fruit or vegetable juice do you drink? One serving is about ½ cup or 125 ml.

### ***Assessment of sociodemographic and behavioural factors***

Ethnicity was categorized as white and non-white because there was little ethnic diversity in the cohort. Educational attainment was categorized as high school or lower, college level, and university level or higher. Marital status was grouped as married or living together and single, divorced, separated, or widowed. For smoking behaviour, participants were grouped as non-smoker, former smoker, and current smoker. For alcohol drinking, respondents were classified as abstainer, occasional drinker (>0- ≤ 2-3 times/month), regular drinker (≥ 1 time/week - ≤ 2-3 times/week), and habitual drinker (≥ 4-5 times/week).<sup>19</sup>

Physical activity was assessed by using either the long or short form of the International Physical Activity Questionnaire (IPAQ).<sup>20</sup> For evaluation of total physical activity, we calculated metabolic equivalent minutes per week (MET-min/week) for each participant with data derived from the long and short form questionnaires, respectively. The MET scores were computed according to the IPAQ scoring protocol.<sup>21</sup>

1  
2  
3 We then ranked the sex-specific total MET scores into tertiles for data derived from the long and short  
4 form questionnaires, separately. Levels of total physical activity were classified as low, medium, and high  
5 by the low to high MET score tertiles.  
6  
7  
8  
9

### 10 11 *Assessment of chronic diseases*

12  
13 Self-reported current medication use was collected and medication data were coded according to the Nova  
14 Scotia Formulary (NSF) ([www.nspharmacare.ca](http://www.nspharmacare.ca)).<sup>22</sup> The NSF uses the standardised Anatomical  
15 Therapeutic Chemical (ATC) Classification System which was developed by the World Health  
16 Organization. Participants also reported chronic diseases diagnosed by a physician. For this analysis, we  
17 defined chronic disease (yes/no) based upon the following: (a) self-reported diabetes mellitus and/or  
18 current use of antidiabetic medications, or (b) self-reported myocardial infarction, stroke and/or current  
19 use of CVD medications, or (c) self-reported cancer.  
20  
21  
22  
23  
24  
25  
26  
27  
28  
29

### 30 31 *Physical measurements*

32  
33 Body weight, percentage fat mass, fat mass, and fat free mass were measured using the Tanita  
34 bioelectrical impedance device (Tanita BC-418, Tanita Corporation of America Inc., Arlington Heights,  
35 Illinois). Height was measured by a Seca stadiometer. BMI was calculated as weight in kilograms divided  
36 by height in meters squared. We also calculated fat mass index (FMI) and fat free mass index (FFMI) by  
37 dividing fat mass and fat free mass in kilograms by height in meters squared, respectively. Waist and hip  
38 circumferences were measured by using Lufin steel tape. Obesity was defined as a BMI  $\geq 30$  kg/m<sup>2</sup>.  
39  
40  
41  
42  
43  
44  
45 Abdominal obesity was defined as a waist circumference  $\geq 102$  cm for men or  $\geq 88$  cm for women.<sup>23</sup>  
46  
47  
48  
49

50  
51 Among our study participants, measured data were available for 72% of participants for weight and  
52 height, 69% for both waist and hip circumferences, and 70% for body composition. For participants who  
53 did not have measured anthropometric indices, self-reported measures were utilized in the analyses.  
54  
55  
56  
57  
58  
59  
60

### *Statistical analyses*

We computed Pearson partial correlation coefficients between fruit and vegetable intake and anthropometric measures and body composition with adjustment for age and sex. To examine the associations between fruit and vegetable intake with obesity, we derived z-scores for the intakes of total fruit and vegetable, vegetable, fruit, and fruit or vegetable juice, respectively. Z-scores enable us to combine scores from the exposure variables that have different means, standard deviations, and ranges. Further, the procedure standardizes the distributions of the exposure variables and for this analysis, increased the statistical power in both the linear and logistic regression analyses when the exposure variables were treated as a continuous variable. We categorized total fruit and vegetable, vegetable, and fruit intake into low, medium, and high levels according to the approximate tertiles, respectively. Fruit or vegetable juice intake was dichotomized (yes/no) as 49% of the participants did not consume fruit or vegetable juice. We utilized multiple linear regression models with Robust M estimator to evaluate the associations between fruit and vegetable intake with BMI, waist circumference, percentage fat mass, and FMI. We employed multiple logistic regression models to compute the odds ratios (OR) and 95% confidence intervals (CI) of having obesity and abdominal obesity across different levels of fruit and vegetable intake. To evaluate the independent associations between consumption of fruit, vegetable, and fruit or vegetable juice with obesity, we performed both the linear and logistic regression analyses using three models: model one was adjusted for age, sex, and province; model two was further adjusted for ethnicity, socioeconomic status, behavioural factors, and chronic disease based on model one; and model three was additionally and mutually adjusted for fruit, vegetable, and fruit or vegetable juice intake based on model two.

Further, as we found a consistent inverse association between daily fruit intake and adiposity, we plotted the associations of fruit intake with BMI, waist circumference, percentage fat mass, and FMI by using the restricted cubic spline (RCS).<sup>24</sup> We performed the RCS plot among participants who reported daily fruit intake  $\leq 6$  servings/day (99.5% of total participants) and utilized three knots located at the 5<sup>th</sup>, 50<sup>th</sup>, and

1  
2  
3 95<sup>th</sup> percentiles of the fruit intake distribution. All the models were multivariable with adjustment for all  
4 of the covariables and the intakes of vegetable and fruit or vegetable juice. Given that energy expenditure  
5 has been shown to be strongly and inversely associated with body adiposity,<sup>1,19</sup> we also analysed the  
6 interactions between fruit intake and physical activity in relation to risks of obesity and abdominal  
7 obesity. In addition, we evaluated whether substituting one standard deviation (SD) of fruit intake for  
8 vegetable intake or vice versa might affect obesity risk by using multivariable logistic regression  
9 models.<sup>16</sup> We carried out a sensitivity analysis among participants with all measured body adiposity  
10 measurements (n=17528) and yielded a similar pattern of results. We, therefore, reported the results for  
11 the entire samples. Statistical significance was defined as  $P < 0.05$  (two-sided). Data management and  
12 analyses were performed with SAS for Windows, version 9.4 (SAS Institute, Cary, North Carolina).  
13  
14  
15  
16  
17  
18  
19  
20  
21  
22  
23  
24  
25

## 26 **Results**

### 27 *Fruit and vegetable consumption among study participants*

28  
29 Average total fruit and vegetable intake was 5.4 servings per day in the study participants (4.9  
30 servings/day in men and 5.6 servings/day in women). Only 22% of men and 32% of women reported total  
31 fruit and vegetable intake  $\geq 7$  servings/day, respectively (Table 1 and Supplementary Table 1). The  
32 correlation between fruit or vegetable juice intake with fruit intake was higher compared with that for  
33 vegetable intake. Participants who reported high levels of fruit and vegetable intake were more likely to  
34 be females, white, married, have higher levels of education, and engage in higher levels of physical  
35 activity. They were also less likely to be current smokers compared with those who reported low levels of  
36 fruit and vegetable consumption (data not shown).  
37  
38  
39  
40  
41  
42  
43  
44  
45  
46  
47  
48  
49

### 50 *Fruit and vegetable consumption and body adiposity*

51 There was a consistently negative correlation between fruit and vegetable intake with body adiposity  
52 measures (Supplementary Table 1). There was no statistically significant correlation between fruit and  
53 vegetable intake with FFMI.  
54  
55  
56  
57



1  
2  
3  
4  
5 In the multivariable linear regression analyses, one SD increment of total fruit and vegetable intake was  
6 inversely associated with BMI ( $-0.12 \text{ kg/m}^2$ ; 95% CI,  $-0.19, -0.05$ ), waist circumference ( $-0.40 \text{ cm}$ ; 95%  
7 CI,  $-0.58, -0.23$ ), percentage fat mass ( $-0.30 \%$ ; 95% CI,  $-0.44, -0.17$ ), and FMI ( $-0.14 \text{ kg/m}^2$ ; 95% CI,  $-$   
8  $0.19, -0.08$ ) (Table 2). In the multivariable logistic regression analyses, individuals with high levels of  
9 total fruit and vegetable intake had reduced likelihoods of 12% (OR, 0.88; 95% CI, 0.83, 0.94) for having  
10 abdominal obesity compared with those with low levels ( $P$  for trend  $< 0.001$ , Table 3).  
11  
12  
13  
14  
15  
16  
17  
18  
19

### 20 ***Independent associations of fruit, vegetable, and fruit or vegetable juice consumption with body*** 21 ***adiposity***

22  
23  
24 In the multivariable regression analyses, fruit consumption was consistently inversely associated with  
25 adiposity measurements (Table 2 and Figure 1) and the likelihoods for obesity and abdominal obesity  
26 (Table 3). Compared with those with low levels of fruit consumption, individuals with medium to high  
27 levels of fruit consumption had ORs of 0.92 (95% CI, 0.86, 0.98) and 0.90 (95% CI, 0.84, 0.96) for  
28 obesity and 0.97 (95% CI, 0.91, 1.03) and 0.88 (95% CI, 0.82, 0.94) for abdominal obesity, respectively  
29 (All  $P$  for trend  $< 0.05$ ). These associations remained materially unchanged after further controlling for  
30 the intake of vegetable and fruit or vegetable juice. The similar associations were evident for juice intake  
31 but were less consistent than those observed for fruit intake. Moreover, fruit consumption was shown to  
32 have additive effects with total physical activity in terms of the likelihoods for obesity and abdominal  
33 obesity (Supplementary Figure 1).  
34  
35  
36  
37  
38  
39  
40  
41  
42  
43  
44  
45  
46

47 The inverse association between vegetable consumption and obesity was attenuated and became positive  
48 after further controlling for the intakes of fruit and fruit or vegetable juice (Table 3). Further analyses  
49 showed that substituting one SD of the intakes of fruit and juice for vegetables resulted in the reduced  
50 likelihoods for obesity (Figure 2 and Supplementary Table 2). Conversely, substituting one SD of  
51 vegetable intake for fruit and juice led to the increased likelihoods for obesity.  
52  
53  
54  
55  
56  
57

## Discussion

In this large-scale, population-based cross-sectional analysis, we found that total daily fruit and vegetable intake among Atlantic Canadians was comparable to those reported from a nationally representative sample of Canadians.<sup>25</sup> We observed that total fruit and vegetable intake was inversely associated with body adiposity. This association appeared to be primarily attributable to fruit consumption. These findings are in line with the previous studies reporting the potentially favourable role of fruit consumption in effective body weight management.<sup>9,14,15</sup> However, after controlling for the consumption of fruit, fruit or vegetable juice, and other covariables, vegetable intake tended to be positively related to obesity. This finding is consistent with that reported in a longitudinal study carried out in American women.<sup>15</sup> However, the mechanisms underlying these observed associations is unclear.

Thus far, substantial evidence appears to show that adequate fruit and vegetable consumption reduces the risk of chronic disease.<sup>26</sup> With respect to body weight management, regular daily fruit consumption may displace energy-dense foods, resulting in attenuated dietary energy density and reduced total energy intake.<sup>27</sup> Fruits have abundant soluble dietary fibres which may enhance post-meal satiety and decrease both glycaemic index and glycaemic load of consumed foods causing lowered energy absorption.<sup>28</sup> Moreover, fruits are rich in phytochemicals that have anti-oxidative and anti-inflammatory effects against the obesity-induced oxidative stress and subclinical inflammation.<sup>26,29</sup> While most vegetables have these characteristics, in multivariable regression analyses, we observed a different association between vegetable intake and obesity from those for fruit consumption.

In our analyses, the association between 100% fruit or vegetable juice and obesity was similar to the association between fruit and obesity. Some longitudinal studies have shown that a vegetable-rich dietary pattern might lead to increased body weight<sup>30</sup> and an unhealthful plant-based diet that was featured with sweetened foods and beverages, refined grains, and potatoes might be related to increased incidence of

1  
2  
3 type 2 diabetes.<sup>31</sup> Regular potato intake, especially french fries, was associated with obesity.<sup>32</sup> These  
4 findings may imply that some fatty substances added during the preparation of vegetables and the type of  
5 vegetable consumed (e.g., starchy vegetables), might play a role in the positive association between  
6 increasing vegetable intake and increasing obesity. Our data appeared to support this hypothesis as oil  
7 products and starchy vegetables are seldom used to prepare 100% juice. Nevertheless, further research is  
8 needed to clarify the potential role of vegetable intake in obesity development.  
9  
10  
11  
12  
13  
14  
15

16  
17  
18 To our knowledge, this is the first large-scale, population-based study investigating the associations  
19 between fruit and vegetable intake with objectively measured body composition. Our findings imply that  
20 fruit and vegetable consumption may need to be assessed separately to evaluate the relationship between  
21 fruit and vegetable intake and body weight changes. To investigate the influence of fruit and vegetable  
22 intake on body weight management, body fat mass assessment may be considered as an important  
23 measurement along with anthropometrics.  
24  
25  
26  
27  
28  
29  
30  
31

32  
33 The large sample size and the objectively measured body composition are major strengths of this study.  
34 Nevertheless, our study has some limitations. Firstly, our study participants were recruited as volunteers  
35 of the Atlantic PATH cohort, therefore, our study sample was not a representative sample of the  
36 populations of Atlantic Canada. The majority were Caucasians and about 70% of study participants were  
37 females.<sup>18</sup> Thus, this may limit the generalizability of our current cross-sectional study findings to other  
38 populations. Secondly, due to the constraints of the data collection, we were not able to calculate the total  
39 energy intake of study participants and analyse the associations between different types of fruit and  
40 vegetable consumption with the study outcomes. However, we controlled for total physical activity in the  
41 multivariable regression analyses and found an additive effect of the interactions between fruit intake and  
42 physical activity on obesity risk. These findings suggested that the observed association between fruit  
43 intake and obesity risk was independent of energy expenditure. Thirdly, though we collected data on the  
44  
45  
46  
47  
48  
49  
50  
51  
52  
53  
54  
55  
56  
57  
58  
59  
60

1  
2  
3 habitual fruit, vegetable, and 100% juice intake, the cross-sectional nature of the study design did not  
4 enable us to make either temporal or causal inference.  
5  
6  
7  
8

9 In summary, our findings suggested that higher levels of fruit and vegetable consumption were associated  
10 with lower levels of body adiposity. Fruit intake was consistently inversely associated with fat mass and  
11 obesity. While evidence regarding the positive health effects of vegetable consumption on chronic disease  
12 is substantial,<sup>26</sup> our findings may indicate that further research is needed to investigate whether the types  
13 of vegetable consumed and culinary approaches adopted for vegetable preparation are also important for  
14 the effective management of body weight. Given four in five men and two in three women in our study  
15 populations did not report adequate fruit and vegetable intake, there is a need to implement  
16 comprehensive intervention strategies to promote frequent and adequate fruit and vegetable consumption  
17 across Atlantic Canada.  
18  
19  
20  
21  
22  
23  
24  
25  
26  
27  
28  
29  
30  
31  
32  
33  
34  
35  
36  
37  
38  
39  
40  
41  
42  
43  
44  
45  
46  
47  
48  
49  
50  
51  
52  
53  
54  
55  
56  
57  
58  
59  
60

**Acknowledgments:**

We acknowledge the support of all participants in the Atlantic PATH Project. We thank the Atlantic PATH team members for data collection and management.

Production of this study has been made possible through the financial support from the Canadian Partnership Against Cancer and Health Canada. The study funders had no involvement in the study design; in the collection, analysis and interpretation of data; in the writing of the report; and in the decision to submit the article for publication. The views expressed herein represent the views of the authors and do not necessarily represent the views of the funders.

**Authors' contributions:**

Study conception and design: ZY, LP, and TD

Acquisition, analysis, and interpretation of data and drafting of manuscript: ZY

Critical revision of the article: VD, YC, CF, SG, MK, LP, ES, and TD

All authors have full access to all the data in the study, take responsibility for the integrity of the data and the accuracy of the data analysis, and give final approval of the version to be submitted.

**Conflict of interest:** None to declare.

**Data sharing statement:**

No datasets were generated during the current study. Data from the Atlantic PATH study is not publicly available to researchers without an approved data access request to Atlantic PATH, as per the Atlantic PATH consent form and study protocol. While the authors cannot provide data to a third party directly, the dataset can be provided by Atlantic PATH following a data access request approval. Interested researchers should contact Atlantic PATH (<http://atlanticpath.ca/>).

## References

- 1 Haslam DW, James WPT. Obesity. *The Lancet* 2005; **366**: 1197–1209.
- 2 Twells LK, Gregory DM, Reddigan J, Midodzi WK. Current and predicted prevalence of obesity in Canada: a trend analysis. *CMAJ Open* 2014; **2**: E18-26.
- 3 Health Canada. How many food guide servings of fruits and vegetables do I need? - Canada's Food Guide. 2007. <http://www.hc-sc.gc.ca/fn-an/food-guide-aliment/choose-choix/fruit/need-besoin-eng.php> (accessed 14 Mar2016).
- 4 Wang X, Ouyang Y, Liu J, Zhu M, Zhao G, Bao W *et al*. Fruit and vegetable consumption and mortality from all causes, cardiovascular disease, and cancer: systematic review and dose-response meta-analysis of prospective cohort studies. *BMJ* 2014; **349**: g4490.
- 5 Du H, Li L, Bennett D, Guo Y, Key TJ, Bian Z *et al*. Fresh fruit consumption and major cardiovascular disease in China. *N Engl J Med* 2016; **374**: 1332–1343.
- 6 He FJ, Nowson CA, MacGregor GA. Fruit and vegetable consumption and stroke: meta-analysis of cohort studies. *Lancet* 2006; **367**: 320–326.
- 7 Cooper AJ, Sharp SJ, Lentjes MAH, Luben RN, Khaw K-T, Wareham NJ *et al*. A prospective study of the association between quantity and variety of fruit and vegetable intake and incident type 2 diabetes. *Diabetes Care* 2012; **35**: 1293–1300.
- 8 Bradbury KE, Appleby PN, Key TJ. Fruit, vegetable, and fiber intake in relation to cancer risk: findings from the European Prospective Investigation into Cancer and Nutrition (EPIC). *Am J Clin Nutr* 2014; **100 Suppl 1**: 394S–8S.
- 9 Alinia S, Hels O, Tetens I. The potential association between fruit intake and body weight--a review. *Obes Rev* 2009; **10**: 639–647.
- 10 Ledoux TA, Hingle MD, Baranowski T. Relationship of fruit and vegetable intake with adiposity: a systematic review. *Obes Rev* 2011; **12**: e143-150.
- 11 Mytton OT, Nnoaham K, Eyles H, Scarborough P, Ni Mhurchu C. Systematic review and meta-analysis of the effect of increased vegetable and fruit consumption on body weight and energy intake. *BMC Public Health* 2014; **14**: 886.
- 12 Schwingshackl L, Hoffmann G, Kalle-Uhlmann T, Arregui M, Buijsse B, Boeing H. Fruit and vegetable consumption and changes in anthropometric variables in adult populations: a systematic review and meta-analysis of prospective cohort studies. *PloS One* 2015; **10**: e0140846.
- 13 Kaiser KA, Brown AW, Bohan Brown MM, Shikany JM, Mattes RD, Allison DB. Increased fruit and vegetable intake has no discernible effect on weight loss: a systematic review and meta-analysis. *Am J Clin Nutr* 2014; **100**: 567–576.

- 14 Drapeau V, Després J-P, Bouchard C, Allard L, Fournier G, Leblanc C *et al*. Modifications in food-group consumption are related to long-term body-weight changes. *Am J Clin Nutr* 2004; **80**: 29–37.
- 15 Rautiainen S, Wang L, Lee I-M, Manson JE, Buring JE, Sesso HD. Higher intake of fruit, but not vegetables or fiber, at baseline is associated with lower risk of becoming overweight or obese in middle-aged and older women of normal BMI at baseline. *J Nutr* 2015; **145**: 960–968.
- 16 Willett W. *Nutritional epidemiology*. Oxford University Press, 1998.
- 17 Borugian MJ, Robson P, Fortier I, Parker L, McLaughlin J, Knoppers BM *et al*. The Canadian Partnership for Tomorrow Project: building a pan-Canadian research platform for disease prevention. *CMAJ Can Med Assoc J J Assoc Medicale Can* 2010; **182**: 1197–1201.
- 18 Sweeney E, Cui Y, DeClercq V, Devichand P, Forbes C, Grandy S *et al*. Cohort Profile: The Atlantic Partnership for Tomorrow's Health (Atlantic PATH) Study. *Int J Epidemiol* 2017; **46**: 1762–1763i.
- 19 Yu ZM, Parker L, Dummer TJB. Depressive symptoms, diet quality, physical activity, and body composition among populations in Nova Scotia, Canada: Report from the Atlantic Partnership for Tomorrow's Health. *Prev Med* 2014; **61**: 106–113.
- 20 Craig CL, Marshall AL, Sjöström M, Bauman AE, Booth ML, Ainsworth BE *et al*. International physical activity questionnaire: 12-country reliability and validity. *Med Sci Sports Exerc* 2003; **35**: 1381–1395.
- 21 IPAQ scoring protocol - International Physical Activity Questionnaire. <https://sites.google.com/site/theipaq/scoring-protocol> (accessed 28 Oct2016).
- 22 Pahor M, Chrischilles EA, Guralnik JM, Brown SL, Wallace RB, Carbonin P. Drug data coding and analysis in epidemiologic studies. *Eur J Epidemiol* 1994; **10**: 405–411.
- 23 Grundy SM, Cleeman JI, Daniels SR, Donato KA, Eckel RH, Franklin BA *et al*. Diagnosis and management of the metabolic syndrome: an American Heart Association/National Heart, Lung, and Blood Institute Scientific Statement. *Circulation* 2005; **112**: 2735–2752.
- 24 Desquilbet L, Mariotti F. Dose-response analyses using restricted cubic spline functions in public health research. *Stat Med* 2010; **29**: 1037–1057.
- 25 Black JL, Billette J-M. Do Canadians meet Canada's Food Guide's recommendations for fruits and vegetables? *Appl Physiol Nutr Metab* 2013; **38**: 234–242.
- 26 Boeing H, Bechthold A, Bub A, Ellinger S, Haller D, Kroke A *et al*. Critical review: vegetables and fruit in the prevention of chronic diseases. *Eur J Nutr* 2012; **51**: 637–663.
- 27 de Oliveira MC, Sichieri R, Venturim Mozzer R. A low-energy-dense diet adding fruit reduces weight and energy intake in women. *Appetite* 2008; **51**: 291–295.

- 1  
2  
3 28 Howarth NC, Saltzman E, Roberts SB. Dietary fiber and weight regulation. *Nutr Rev* 2001;  
4 **59**: 129–139.  
5  
6 29 Liu RH. Potential synergy of phytochemicals in cancer prevention: mechanism of action. *J*  
7 *Nutr* 2004; **134**: 3479S–3485S.  
8  
9 30 Shi Z, Yuan B, Hu G, Dai Y, Zuo H, Holmboe-Ottesen G. Dietary pattern and weight change  
10 in a 5-year follow-up among Chinese adults: results from the Jiangsu Nutrition Study. *Br J*  
11 *Nutr* 2011; **105**: 1047–1054.  
12  
13 31 Satija A, Bhupathiraju SN, Rimm EB, Spiegelman D, Chiuve SE, Borgi L *et al*. Plant-based  
14 dietary patterns and incidence of type 2 diabetes in US men and women: results from three  
15 prospective cohort studies. *PLoS Med* 2016; **13**: e1002039.  
16  
17 32 Borch D, Juul-Hindsgaul N, Veller M, Astrup A, Jaskolowski J, Raben A. Potatoes and risk  
18 of obesity, type 2 diabetes, and cardiovascular disease in apparently healthy adults: a  
19 systematic review of clinical intervention and observational studies. *Am J Clin Nutr* 2016;  
20 **104**: 489–498.  
21  
22  
23  
24  
25  
26  
27  
28  
29  
30  
31  
32  
33  
34  
35  
36  
37  
38  
39  
40  
41  
42  
43  
44  
45  
46  
47  
48  
49  
50  
51  
52  
53  
54  
55  
56  
57  
58  
59  
60



### Figure legends

Figure 1. Restricted cubic spline plots of the associations between daily fruit intake with body mass index (A), waist circumference (B), percentage fat mass (C), and fat mass index (D) among populations in Atlantic Canada<sup>a</sup>.

Solid lines denote  $\beta$  coefficients of BMI (A), waist circumference (B), percentage fat mass (C), and FMI (D); dashed lines denote 95% CIs.

<sup>a</sup>Adjusted for age, sex, province, ethnicity, education, marital status, smoking, alcohol use, physical activity, chronic disease, and intake of vegetable and fruit or vegetable juice.

Figure 2. Odds ratios (95% confidence intervals) for obesity and abdominal obesity after replacing one standard deviation of fruit and fruit or vegetable juice <sup>a</sup>.

<sup>a</sup>Adjusted for age, sex, province, ethnicity, education, marital status, smoking, alcohol use, physical activity, and chronic disease.

**Table 1. Characteristics of study participants\***

| Characteristics                                        | n    | Men<br>(n=7979) | n     | Women<br>(n=18361) |
|--------------------------------------------------------|------|-----------------|-------|--------------------|
| Age, year                                              |      | 54.0 (9.3)      |       | 52.6 (9.0)         |
| Total fruit and vegetable, serving/day                 |      | 4.9 (2.7)       |       | 5.6 (2.6)          |
| Vegetable, serving/day                                 |      | 2.1 (1.4)       |       | 2.7 (1.5)          |
| Fruit, serving/day                                     |      | 1.8 (1.4)       |       | 2.3 (1.3)          |
| 100% fruit or vegetable juice, serving/day             |      | 0.9 (1.1)       |       | 0.6 (0.9)          |
| Total fruit and vegetable $\geq 7$ servings/day, n (%) |      | 1750 (21.9)     |       | 5803 (31.6)        |
| Body weight, kg                                        |      | 85.0 (17.8)     |       | 76.7 (17.8)        |
| Body height, cm                                        |      | 171.8 (8.4)     |       | 164.4 (6.7)        |
| Body mass index, kg/m <sup>2</sup>                     |      | 28.7 (5.6)      |       | 28.4 (6.3)         |
| Waist circumference, cm                                |      | 97.0 (14.0)     |       | 92.7 (15.0)        |
| Hip circumference, cm                                  |      | 104.7 (10.7)    |       | 106.1 (12.8)       |
| Waist-to-hip ratio                                     |      | 0.93 (0.10)     |       | 0.87 (0.09)        |
| Percentage fat mass, %                                 | 5311 | 30.8 (9.4)      | 13005 | 34.7 (8.8)         |
| Fat mass index, kg/m <sup>2</sup>                      | 5307 | 9.1 (4.3)       | 12997 | 10.1 (4.4)         |
| Fat free mass index, kg/m <sup>2</sup>                 | 5306 | 19.4 (3.2)      | 12996 | 18.0 (3.1)         |
| Province, n (%)                                        |      |                 |       |                    |
| Nova Scotia                                            |      | 4272 (53.5)     |       | 9639 (52.5)        |
| New Brunswick                                          |      | 2283 (28.6)     |       | 5424 (29.5)        |
| Newfoundland and Labrador                              |      | 1194 (15.0)     |       | 2630 (14.3)        |
| Prince Edward Island                                   |      | 230 (2.9)       |       | 668 (3.6)          |
| Ethnicity, n (%)                                       |      |                 |       |                    |
| White                                                  |      | 7178 (90.0)     |       | 16016 (87.2)       |
| Non-white                                              |      | 447 (5.6)       |       | 1218 (6.6)         |
| DNK/PNA                                                |      | 354 (4.4)       |       | 1127 (6.1)         |
| Education, n (%)                                       |      |                 |       |                    |
| Less than high school                                  |      | 1550 (19.4)     |       | 3293 (17.9)        |
| College level                                          |      | 2978 (37.3)     |       | 7799 (42.5)        |
| University level or higher                             |      | 3430 (43.0)     |       | 7217 (39.3)        |
| DNK/PNA                                                |      | 21 (0.3)        |       | 52 (0.3)           |
| Marital status, n (%)                                  |      |                 |       |                    |
| Married or living together                             |      | 6971 (87.4)     |       | 14120 (76.9)       |
| Single, divorced, separated, or widowed                |      | 988 (12.4)      |       | 4185 (22.8)        |
| DNK/PNA                                                |      | 20 (0.3)        |       | 56 (0.3)           |
| Smoking status, n (%)                                  |      |                 |       |                    |
| Never                                                  |      | 3796 (47.6)     |       | 9461 (51.5)        |
| Former                                                 |      | 3381 (42.4)     |       | 7023 (38.2)        |
| Current                                                |      | 763 (9.6)       |       | 1719 (9.4)         |
| DNK/PNA                                                |      | 39 (0.5)        |       | 158 (0.9)          |
| Alcohol drinking, n (%)                                |      |                 |       |                    |
| Abstainer                                              |      | 810 (10.2)      |       | 1985 (10.8)        |
| Occasional drinker                                     |      | 2322 (29.1)     |       | 8489 (46.2)        |
| Regular drinker                                        |      | 2793 (35.0)     |       | 5224 (28.5)        |
| Habitual drinker                                       |      | 1833 (23.0)     |       | 2412 (13.1)        |
| DNK/PNA                                                |      | 221 (2.8)       |       | 251 (1.4)          |
| Total physical activity, n (%)                         |      |                 |       |                    |
| Low                                                    |      | 2615 (32.8)     |       | 6032 (32.9)        |
| Medium                                                 |      | 2725 (34.2)     |       | 6144 (33.5)        |
| High                                                   |      | 2628 (33.0)     |       | 6162 (33.6)        |
| Chronic disease <sup>†</sup> , yes, n (%)              |      | 2618 (32.8)     |       | 4767 (26.0)        |

|                                                  |             |              |
|--------------------------------------------------|-------------|--------------|
| <b>Obesity<sup>‡</sup>, yes, n (%)</b>           | 2774 (34.8) | 6144 (33.5)  |
| <b>Abdominal obesity<sup>§</sup>, yes, n (%)</b> | 2590 (32.5) | 10951 (59.6) |

DNK/PNA, do not know or prefer not to answer.

\* Data are means (standard deviation) and number of participants (percentage). Percentages may not total 100 due to rounding.

<sup>†</sup> Self-reported diabetes mellitus and/or current use of antidiabetic medications, self-reported cardiovascular disease and/or current use of medications for cardiovascular disease treatment, and self-reported cancer.

<sup>‡</sup> BMI  $\geq$  30 kg/m<sup>2</sup>.

<sup>§</sup> Waist circumference  $\geq$  102 cm for men and  $\geq$  88 cm for women.

For peer review only

1  
2  
3  
4  
5  
6  
7  
8  
9  
10  
11  
12  
13  
14  
15  
16  
17  
18  
19  
20  
21  
22  
23  
24  
25  
26  
27  
28  
29  
30  
31  
32  
33  
34  
35  
36  
37  
38  
39  
40  
41  
42  
43  
44  
45  
46  
47

**Table 2. Associations between one standard deviation increment of fruit and vegetable intake with adiposity measurements**

|                                                                  | <b>β (95% CI)</b> |                |                            |                |                            |                |                       |                |
|------------------------------------------------------------------|-------------------|----------------|----------------------------|----------------|----------------------------|----------------|-----------------------|----------------|
|                                                                  | <b>BMI</b>        |                | <b>Waist circumference</b> |                | <b>Percentage fat mass</b> |                | <b>Fat mass index</b> |                |
| <b>Total fruit and vegetable</b>                                 |                   |                |                            |                |                            |                |                       |                |
| Simple model*                                                    | -0.18             | (-0.25, -0.12) | -0.67                      | (-0.85, -0.50) | -0.36                      | (-0.49, -0.23) | -0.16                 | (-0.21, -0.10) |
| Multivariable model†                                             | -0.12             | (-0.19, -0.05) | -0.40                      | (-0.58, -0.23) | -0.30                      | (-0.44, -0.17) | -0.14                 | (-0.19, -0.08) |
| <b>Vegetable</b>                                                 |                   |                |                            |                |                            |                |                       |                |
| Simple model*                                                    | -0.11             | (-0.18, -0.05) | -0.52                      | (-0.70, -0.35) | -0.25                      | (-0.38, -0.11) | -0.11                 | (-0.16, -0.05) |
| Multivariable model†                                             | -0.05             | (-0.11, 0.02)  | -0.25                      | (-0.43, -0.08) | -0.18                      | (-0.31, -0.04) | -0.08                 | (-0.14, -0.03) |
| Additional adjustment for fruit and fruit or vegetable juice     | -0.01             | (-0.08, 0.06)  | -0.13                      | (-0.32, 0.06)  | -0.06                      | (-0.21, 0.08)  | -0.03                 | (-0.10, 0.03)  |
| <b>Fruit</b>                                                     |                   |                |                            |                |                            |                |                       |                |
| Simple model*                                                    | -0.14             | (-0.21, -0.08) | -0.57                      | (-0.74, -0.39) | -0.35                      | (-0.48, -0.21) | -0.15                 | (-0.21, -0.10) |
| Multivariable model†                                             | -0.09             | (-0.16, -0.03) | -0.36                      | (-0.53, -0.18) | -0.31                      | (-0.44, -0.17) | -0.14                 | (-0.19, -0.08) |
| Additional adjustment for vegetable and fruit or vegetable juice | -0.08             | (-0.15, -0.01) | -0.29                      | (-0.48, -0.10) | -0.27                      | (-0.42, -0.13) | -0.12                 | (-0.18, -0.06) |
| <b>Fruit or vegetable juice</b>                                  |                   |                |                            |                |                            |                |                       |                |
| Simple model*                                                    | -0.13             | (-0.19, -0.06) | -0.25                      | (-0.42, -0.07) | -0.13                      | (-0.26, 0.01)  | -0.06                 | (-0.11, -0.00) |
| Multivariable model†                                             | -0.12             | (-0.18, -0.05) | -0.20                      | (-0.37, -0.03) | -0.11                      | (-0.25, 0.02)  | -0.05                 | (-0.10, 0.01)  |
| Additional adjustment for vegetable and fruit                    | -0.11             | (-0.18, -0.05) | -0.17                      | (-0.35, 0.00)  | -0.09                      | (-0.22, 0.04)  | -0.04                 | (-0.09, 0.02)  |

BMI, body mass index; CI, confidence interval

\* Adjusted for age, sex, and province.

† Adjusted for age, sex, province, ethnicity, education, marital status, smoking, alcohol use, physical activity, and chronic disease.

**Table 3. Associations of fruit and vegetable intake with obesity and abdominal obesity**

|                                                                  | Levels of fruit and vegetable intake, OR (95% CI) |                       |                   | P for trend |
|------------------------------------------------------------------|---------------------------------------------------|-----------------------|-------------------|-------------|
|                                                                  | Low                                               | Medium                | High              |             |
| <b>Obesity</b>                                                   |                                                   |                       |                   |             |
| <b>Total fruit and vegetable</b>                                 | < 4 servings/day                                  | ≥ 4, < 6 servings/day | ≥ 6 servings/day  |             |
| Case/n                                                           | 3714/10308                                        | 2732/8377             | 2472/7655         |             |
| Simple model*                                                    | 1.0 (Reference)                                   | 0.90 (0.84, 0.95)     | 0.88 (0.82, 0.94) | <0.001      |
| Multivariable model†                                             | 1.0 (Reference)                                   | 0.95 (0.89, 1.01)     | 0.95 (0.89, 1.02) | 0.150       |
| <b>Vegetable</b>                                                 | < 2 servings/day                                  | ≥ 2, < 3 servings/day | ≥ 3 servings/day  |             |
| Case/n                                                           | 2451/6821                                         | 2654/7968             | 3813/11551        |             |
| Simple model*                                                    | 1.0 (Reference)                                   | 0.92 (0.85, 0.98)     | 0.94 (0.88, 1.00) | 0.090       |
| Multivariable model†                                             | 1.0 (Reference)                                   | 0.97 (0.91, 1.04)     | 1.05 (0.98, 1.12) | 0.106       |
| Additional adjustment for fruit and fruit or vegetable juice     | 1.0 (Reference)                                   | 1.01 (0.93, 1.08)     | 1.11 (1.03, 1.19) | 0.004       |
| <b>Fruit</b>                                                     | < 1 servings/day                                  | ≥ 1, < 2 servings/day | ≥ 2 servings/day  |             |
| Case/n                                                           | 3226/8936                                         | 2870/8651             | 2822/8753         |             |
| Simple model*                                                    | 1.0 (Reference)                                   | 0.90 (0.84, 0.95)     | 0.86 (0.80, 0.91) | <0.001      |
| Multivariable model†                                             | 1.0 (Reference)                                   | 0.92 (0.86, 0.98)     | 0.90 (0.84, 0.96) | 0.003       |
| Additional adjustment for vegetable and fruit or vegetable juice | 1.0 (Reference)                                   | 0.91 (0.85, 0.97)     | 0.87 (0.81, 0.93) | <0.001      |
| <b>Fruit or vegetable juice</b>                                  | <b>No</b>                                         | <b>Yes</b>            | <b>P</b>          |             |
| Case/n                                                           | 4524/12816                                        | 4394/13524            |                   |             |
| Simple model*                                                    | 1.0 (Reference)                                   | 0.88 (0.84, 0.93)     | <0.001            |             |
| Multivariable model†                                             | 1.0 (Reference)                                   | 0.90 (0.86, 0.95)     | <0.001            |             |
| Additional adjustment for vegetable and fruit                    | 1.0 (Reference)                                   | 0.91 (0.86, 0.96)     | <0.001            |             |
| <b>Abdominal obesity</b>                                         |                                                   |                       |                   |             |
| <b>Total fruit and vegetable</b>                                 | < 4 servings/day                                  | ≥ 4, < 6 servings/day | ≥ 6 servings/day  |             |
| Case/n                                                           | 5307/10308                                        | 4348/8377             | 3886/7655         |             |
| Simple model*                                                    | 1.0 (Reference)                                   | 0.88 (0.83, 0.93)     | 0.80 (0.76, 0.86) | <0.001      |
| Multivariable model†                                             | 1.0 (Reference)                                   | 0.94 (0.88, 1.00)     | 0.88 (0.83, 0.94) | <0.001      |
| <b>Vegetable</b>                                                 | < 2 servings/day                                  | ≥ 2, < 3 servings/day | ≥ 3 servings/day  |             |
| Case/n                                                           | 3390/6821                                         | 4138/7968             | 6013/11551        |             |
| Simple model*                                                    | 1.0 (Reference)                                   | 0.93 (0.87, 0.99)     | 0.84 (0.79, 0.89) | <0.001      |
| Multivariable model†                                             | 1.0 (Reference)                                   | 0.99 (0.92, 1.06)     | 0.94 (0.88, 1.01) | 0.066       |
| Additional adjustment for fruit and fruit or vegetable juice     | 1.0 (Reference)                                   | 1.01 (0.94, 1.09)     | 0.99 (0.92, 1.06) | 0.603       |
| <b>Fruit</b>                                                     | < 1 servings/day                                  | ≥ 1, < 2 servings/day | ≥ 2 servings/day  |             |
| Case/n                                                           | 4479/8936                                         | 4562/8651             | 4500/8753         |             |
| Simple model*                                                    | 1.0 (Reference)                                   | 0.93 (0.88, 0.99)     | 0.82 (0.77, 0.88) | <0.001      |

1  
2  
3  
4  
5  
6  
7  
8  
9  
10  
11  
12  
13  
14  
15  
16  
17  
18  
19  
20  
21  
22  
23  
24  
25  
26  
27  
28  
29  
30  
31  
32  
33  
34  
35  
36  
37  
38  
39  
40  
41  
42  
43  
44  
45  
46  
47

|                                                                  |                 |                   |                   |        |
|------------------------------------------------------------------|-----------------|-------------------|-------------------|--------|
| Multivariable model <sup>†</sup>                                 | 1.0 (Reference) | 0.97 (0.91, 1.03) | 0.88 (0.82, 0.94) | <0.001 |
| Additional adjustment for vegetable and fruit or vegetable juice | 1.0 (Reference) | 0.97 (0.91, 1.04) | 0.88 (0.82, 0.94) | <0.001 |
| <b>Fruit or vegetable juice</b>                                  | <b>No</b>       | <b>Yes</b>        | <b>P</b>          |        |
| Case/n                                                           | 6972/12816      | 6569/13524        |                   |        |
| Simple model*                                                    | 1.0 (Reference) | 0.90 (0.85, 0.95) |                   | <0.001 |
| Multivariable model <sup>†</sup>                                 | 1.0 (Reference) | 0.93 (0.88, 0.98) |                   | 0.005  |
| Additional adjustment for vegetable and fruit                    | 1.0 (Reference) | 0.93 (0.88, 0.98) |                   | 0.004  |

CI, confidence interval; OR, odds ratio.

\* Adjusted for age, sex, and province.

<sup>†</sup> Adjusted for age, sex, province, ethnicity, education, marital status, smoking, alcohol use, physical activity, and chronic disease.

For peer review only

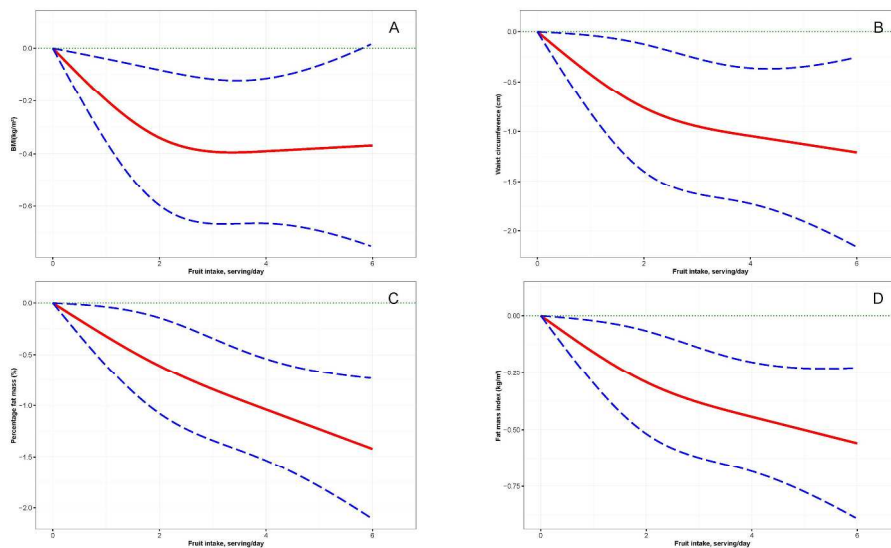

Figure 1.

338x190mm (300 x 300 DPI)

1  
2  
3  
4  
5  
6  
7  
8  
9  
10  
11  
12  
13  
14  
15  
16  
17  
18  
19  
20  
21  
22  
23  
24  
25  
26  
27  
28  
29  
30  
31  
32  
33  
34  
35  
36  
37  
38  
39  
40  
41  
42  
43  
44  
45  
46  
47  
48  
49  
50  
51  
52  
53  
54  
55  
56  
57  
58  
59  
60

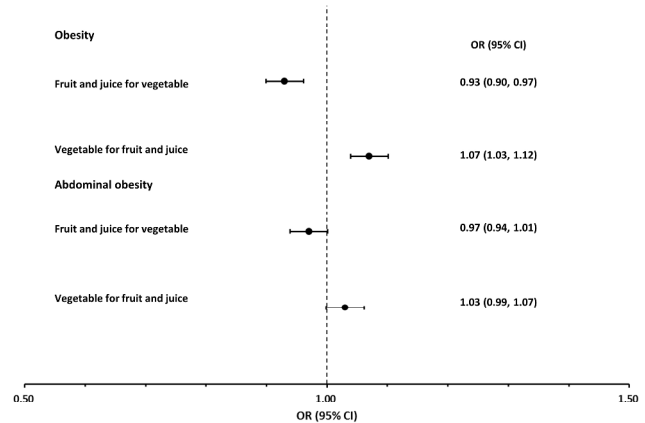

Figure 2.

338x190mm (300 x 300 DPI)

Review only



1  
2  
3 *Supplementary materials*  
4  
5  
6

7 **Fruit and Vegetable Intake and Body Adiposity among Populations in Eastern Canada: the**  
8  
9 **Atlantic Partnership for Tomorrow's Health Study**  
10  
11

12  
13 Zhijie M. Yu<sup>1</sup>, Vanessa DeClercq<sup>1</sup>, Yunsong Cui<sup>1</sup>, Cynthia Forbes<sup>1,2</sup>, Scott Grandy<sup>2</sup>, Melanie Keats<sup>2</sup>,  
14  
15 Louise Parker<sup>1</sup>, Ellen Sweeney<sup>1</sup>, Trevor J.B. Dummer<sup>3</sup>  
16  
17

18  
19  
20 <sup>1</sup>Population Cancer Research Program, Department of Pediatrics, Dalhousie University, Halifax, NS,  
21  
22 Canada  
23

24 <sup>2</sup>School of Health and Human Performance, Dalhousie University, Halifax, NS, Canada  
25

26 <sup>3</sup>Center of Excellence in Cancer Prevention, School of Prevention and Public Health, University of British  
27  
28 Columbia, Vancouver, BC, Canada  
29  
30

**Supplementary Table 1. Mean intakes of fruit and vegetable and correlation between vegetable and fruit and body adiposity measurements**

|                                      | n     | Total fruit and vegetable                        |          | Vegetable |          | Fruit     |          | 100% fruit or vegetable juice |          |
|--------------------------------------|-------|--------------------------------------------------|----------|-----------|----------|-----------|----------|-------------------------------|----------|
| <b>Mean intake (SD), serving/day</b> | 26340 | 5.4 (2.6)                                        |          | 2.5 (1.5) |          | 2.1 (1.3) |          | 0.7 (1.0)                     |          |
|                                      |       | <i>Pearson partial correlation coefficients*</i> |          |           |          |           |          |                               |          |
| <i>Correlation</i>                   |       | <b>r</b>                                         | <b>P</b> | <b>r</b>  | <b>P</b> | <b>r</b>  | <b>P</b> | <b>r</b>                      | <b>P</b> |
| <b>Vegetable</b>                     | 26340 | 0.79                                             | <0.001   | -         | -        | -         | -        | -                             | -        |
| <b>Fruit</b>                         | 26340 | 0.77                                             | <0.001   | 0.41      | <0.001   | -         | -        | -                             | -        |
| <b>100% fruit or vegetable juice</b> | 26340 | 0.43                                             | <0.001   | 0.03      | <0.001   | 0.08      | <0.001   | -                             | -        |
| <b>Body mass index</b>               | 26340 | -0.03                                            | <0.001   | -0.03     | <0.001   | -0.02     | <0.001   | -0.02                         | 0.001    |
| <b>Waist circumference</b>           | 26340 | -0.04                                            | <0.001   | -0.03     | <0.001   | -0.04     | <0.001   | -0.01                         | 0.022    |
| <b>Waist-to-hip ratio</b>            | 26340 | -0.04                                            | <0.001   | -0.03     | <0.001   | -0.03     | <0.001   | -0.01                         | 0.348    |
| <b>Percentage fat mass</b>           | 18316 | -0.04                                            | <0.001   | -0.03     | <0.001   | -0.03     | <0.001   | -0.01                         | 0.066    |
| <b>Fat mass index</b>                | 18304 | -0.03                                            | <0.001   | -0.02     | 0.005    | -0.02     | 0.002    | -0.02                         | 0.030    |
| <b>Fat free mass index</b>           | 18302 | 0.00                                             | 0.693    | 0.00      | 0.916    | 0.01      | 0.112    | -0.01                         | 0.198    |

\* Adjusted for age and sex.

**Supplementary Table 2. Odds ratios for obesity and abdominal obesity by alternatively replacing one standard deviation of intakes of vegetable, fruit, and 100% fruit or vegetable juice**

| Model                      | Obesity, OR (95% CI) | Abdominal obesity, OR (95% CI) |
|----------------------------|----------------------|--------------------------------|
| <b>Fruit for vegetable</b> |                      |                                |
| Simple model*              | 0.95 (0.91, 1.00)    | 0.98 (0.93, 1.03)              |
| Multivariable model†       | 0.92 (0.88, 0.97)    | 0.95 (0.91, 1.00)              |
| <b>Fruit for juice</b>     |                      |                                |
| Simple model*              | 0.99 (0.95, 1.03)    | 0.96 (0.93, 1.00)              |
| Multivariable model†       | 0.99 (0.95, 1.03)    | 0.97 (0.93, 1.01)              |
| <b>Juice for vegetable</b> |                      |                                |
| Simple model*              | 0.97 (0.93, 1.00)    | 1.02 (0.98, 1.05)              |
| Multivariable model†       | 0.93 (0.90, 0.97)    | 0.98 (0.94, 1.02)              |
| <b>Juice for fruit</b>     |                      |                                |
| Simple model*              | 1.01 (0.97, 1.06)    | 1.04 (1.00, 1.08)              |
| Multivariable model†       | 1.01 (0.97, 1.05)    | 1.03 (0.99, 1.07)              |
| <b>Vegetable for fruit</b> |                      |                                |
| Simple model*              | 1.05 (1.00, 1.10)    | 1.02 (0.97, 1.07)              |
| Multivariable model†       | 1.08 (1.03, 1.14)    | 1.05 (1.00, 1.10)              |
| <b>Vegetable for juice</b> |                      |                                |
| Simple model*              | 1.04 (1.00, 1.08)    | 0.99 (0.95, 1.02)              |
| Multivariable model†       | 1.07 (1.03, 1.12)    | 1.02 (0.98, 1.06)              |

CI, confidence interval; OR, odds ratio.

\* Adjusted for age, sex, and province.

† Adjusted for age, sex, province, ethnicity, education, marital status, smoking, alcohol use, physical activity, and chronic disease.

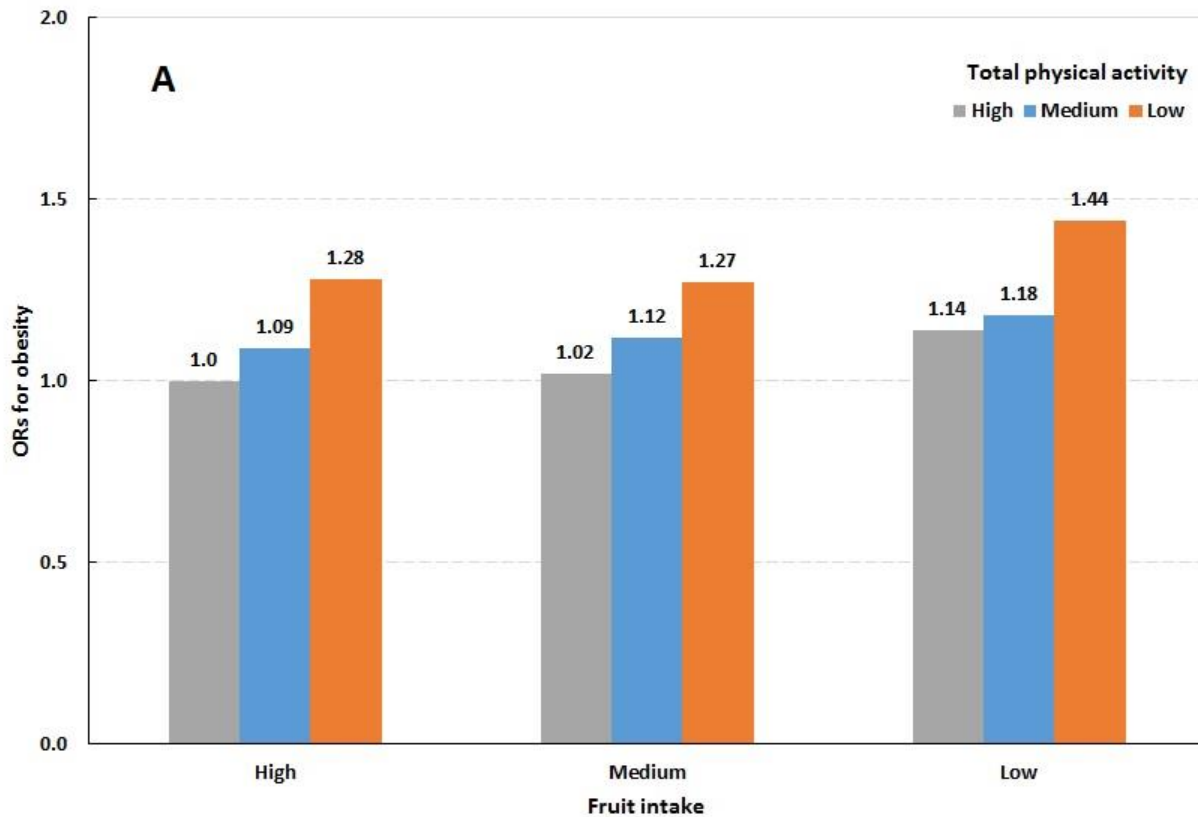

33 Supplementary Figure 1A. Joint associations of daily fruit intake and physical activity with risks of  
34 obesity<sup>a,b</sup>.

35  
36  
37 <sup>a</sup>Adjusted for age, sex, province, ethnicity, education, marital status, smoking, alcohol use, chronic  
38 disease, and intakes of vegetable and fruit or vegetable juice.

39  
40 Participants with the high levels of both fruit intake and total physical activity was the reference group.

41  
42  
43 <sup>b</sup> $P$  for trend < 0.001 and  $P$  for interaction > 0.05.  
44  
45  
46  
47  
48  
49  
50  
51  
52  
53  
54  
55  
56  
57  
58  
59  
60

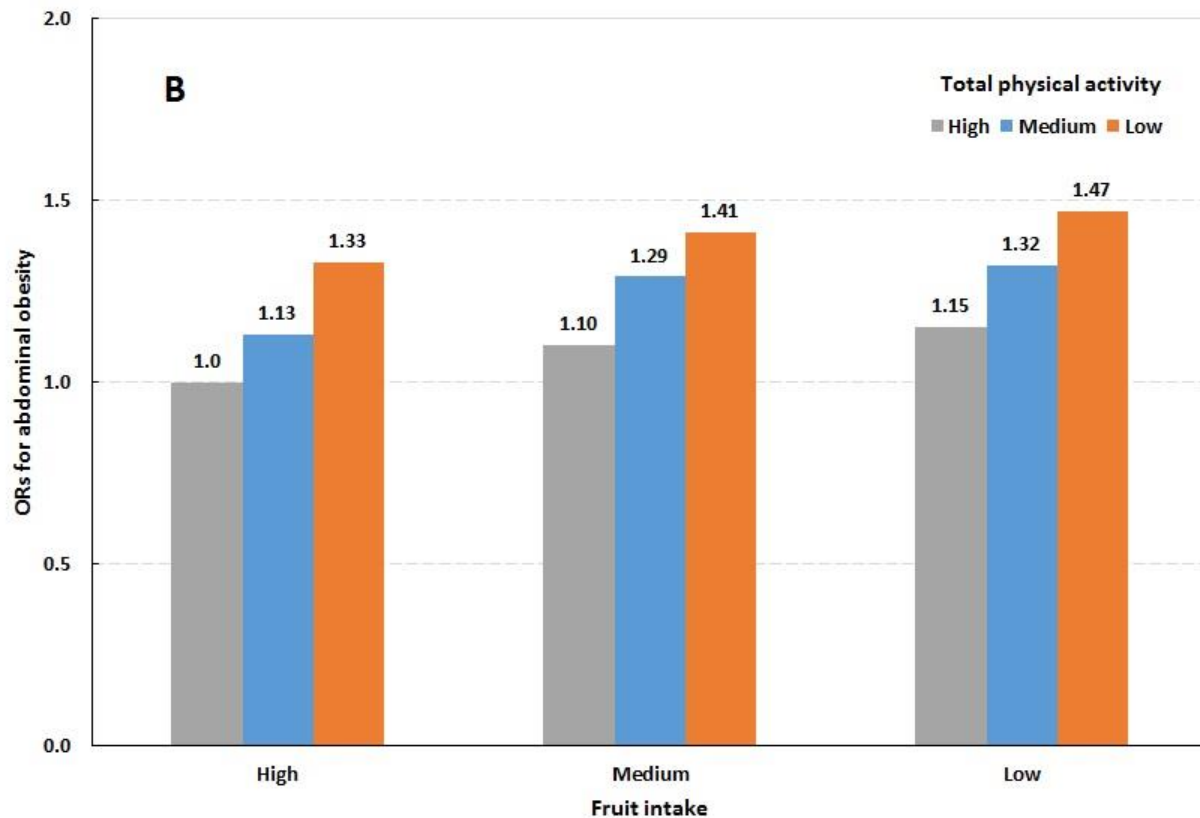

Supplementary Figure 1B. Joint associations of daily fruit intake and physical activity with risks of abdominal obesity<sup>a,b</sup>.

<sup>a</sup>Adjusted for age, sex, province, ethnicity, education, marital status, smoking, alcohol use, chronic disease, and intakes of vegetable and fruit or vegetable juice.

Participants with the high levels of both fruit intake and total physical activity was the reference group.

<sup>b</sup> $P$  for trend < 0.001 and  $P$  for interaction > 0.05.

**STROBE 2007 (v4) Statement—Checklist of items that should be included in reports of *cross-sectional studies***

| Section/Topic             | Item # | Recommendation                                                                                                                                                                       | Reported on page # |
|---------------------------|--------|--------------------------------------------------------------------------------------------------------------------------------------------------------------------------------------|--------------------|
| Title and abstract        | 1      | (a) Indicate the study’s design with a commonly used term in the title or the abstract                                                                                               | 2                  |
|                           |        | (b) Provide in the abstract an informative and balanced summary of what was done and what was found                                                                                  | 2                  |
| <b>Introduction</b>       |        |                                                                                                                                                                                      |                    |
| Background/rationale      | 2      | Explain the scientific background and rationale for the investigation being reported                                                                                                 | 4                  |
| Objectives                | 3      | State specific objectives, including any prespecified hypotheses                                                                                                                     | 4                  |
| <b>Methods</b>            |        |                                                                                                                                                                                      |                    |
| Study design              | 4      | Present key elements of study design early in the paper                                                                                                                              | 5                  |
| Setting                   | 5      | Describe the setting, locations, and relevant dates, including periods of recruitment, exposure, follow-up, and data collection                                                      | 5                  |
| Participants              | 6      | (a) Give the eligibility criteria, and the sources and methods of selection of participants                                                                                          | 5                  |
| Variables                 | 7      | Clearly define all outcomes, exposures, predictors, potential confounders, and effect modifiers. Give diagnostic criteria, if applicable                                             | 6, 7               |
| Data sources/ measurement | 8*     | For each variable of interest, give sources of data and details of methods of assessment (measurement). Describe comparability of assessment methods if there is more than one group | 6, 7               |
| Bias                      | 9      | Describe any efforts to address potential sources of bias                                                                                                                            | 9                  |
| Study size                | 10     | Explain how the study size was arrived at                                                                                                                                            | 6                  |
| Quantitative variables    | 11     | Explain how quantitative variables were handled in the analyses. If applicable, describe which groupings were chosen and why                                                         | 8, 9               |
| Statistical methods       | 12     | (a) Describe all statistical methods, including those used to control for confounding                                                                                                | 8, 9               |
|                           |        | (b) Describe any methods used to examine subgroups and interactions                                                                                                                  | 8, 9               |
|                           |        | (c) Explain how missing data were addressed                                                                                                                                          | 6                  |
|                           |        | (d) If applicable, describe analytical methods taking account of sampling strategy                                                                                                   |                    |
|                           |        | (e) Describe any sensitivity analyses                                                                                                                                                | 9                  |
| <b>Results</b>            |        |                                                                                                                                                                                      |                    |

|                          |     |                                                                                                                                                                                                              |                                          |
|--------------------------|-----|--------------------------------------------------------------------------------------------------------------------------------------------------------------------------------------------------------------|------------------------------------------|
| Participants             | 13* | (a) Report numbers of individuals at each stage of study—eg numbers potentially eligible, examined for eligibility, confirmed eligible, included in the study, completing follow-up, and analysed            | 6                                        |
|                          |     | (b) Give reasons for non-participation at each stage                                                                                                                                                         | 6                                        |
|                          |     | (c) Consider use of a flow diagram                                                                                                                                                                           | N/A                                      |
| Descriptive data         | 14* | (a) Give characteristics of study participants (eg demographic, clinical, social) and information on exposures and potential confounders                                                                     | 9                                        |
|                          |     | (b) Indicate number of participants with missing data for each variable of interest                                                                                                                          | 6                                        |
| Outcome data             | 15* | Report numbers of outcome events or summary measures                                                                                                                                                         | Tables 1 and 3 and Supplementary Table 1 |
| Main results             | 16  | (a) Give unadjusted estimates and, if applicable, confounder-adjusted estimates and their precision (eg, 95% confidence interval). Make clear which confounders were adjusted for and why they were included | All tables                               |
|                          |     | (b) Report category boundaries when continuous variables were categorized                                                                                                                                    | Table 3                                  |
|                          |     | (c) If relevant, consider translating estimates of relative risk into absolute risk for a meaningful time period                                                                                             |                                          |
| Other analyses           | 17  | Report other analyses done—eg analyses of subgroups and interactions, and sensitivity analyses                                                                                                               | 9, Supplementary Table 3 and Figure 1    |
| <b>Discussion</b>        |     |                                                                                                                                                                                                              |                                          |
| Key results              | 18  | Summarise key results with reference to study objectives                                                                                                                                                     | 10                                       |
| Limitations              | 19  | Discuss limitations of the study, taking into account sources of potential bias or imprecision. Discuss both direction and magnitude of any potential bias                                                   | 12                                       |
| Interpretation           | 20  | Give a cautious overall interpretation of results considering objectives, limitations, multiplicity of analyses, results from similar studies, and other relevant evidence                                   | 11-12                                    |
| Generalisability         | 21  | Discuss the generalisability (external validity) of the study results                                                                                                                                        | 12                                       |
| <b>Other information</b> |     |                                                                                                                                                                                                              |                                          |
| Funding                  | 22  | Give the source of funding and the role of the funders for the present study and, if applicable, for the original study on which the present article is based                                                | 14                                       |

\*Give information separately for cases and controls in case-control studies and, if applicable, for exposed and unexposed groups in cohort and cross-sectional studies.

1  
2  
3  
4  
5  
6  
7  
8  
9  
10  
11  
12  
13  
14  
15  
16  
17  
18  
19  
20  
21  
22  
23  
24  
25  
26  
27  
28  
29  
30  
31  
32  
33  
34  
35  
36  
37  
38  
39  
40  
41  
42  
43  
44  
45  
46  
47

**Note:** An Explanation and Elaboration article discusses each checklist item and gives methodological background and published examples of transparent reporting. The STROBE checklist is best used in conjunction with this article (freely available on the Web sites of PLoS Medicine at <http://www.plosmedicine.org/>, Annals of Internal Medicine at <http://www.annals.org/>, and Epidemiology at <http://www.epidem.com/>). Information on the STROBE Initiative is available at [www.strobe-statement.org](http://www.strobe-statement.org).

For peer review only
