# Supplementary material for: Fruit and vegetable intake and body adiposity among populations in Eastern Canada: the Atlantic Partnership for Tomorrow’s Health Study
Source: PubMed Central journal article supplement — BMJ Open. 2018 Apr 10;8(4):e018060. doi: 10.1136/bmjopen-2017-018060 (PMC5898328; doi:10.1136/bmjopen-2017-018060), 2018-04-10
Supplement: bmjopen-2017-018060supp001.pdf [file bmjopen-2017-018060supp001.pdf]

*Supplementary materials*

**Fruit and Vegetable Intake and Body Adiposity among Populations in Eastern Canada: the Atlantic Partnership for Tomorrow's Health Study**

Zhijie M. Yu<sup>1</sup>, Vanessa DeClercq<sup>1</sup>, Yunsong Cui<sup>1</sup>, Cynthia Forbes<sup>1,2</sup>, Scott Grandy<sup>2</sup>, Melanie Keats<sup>2</sup>, Louise Parker<sup>1</sup>, Ellen Sweeney<sup>1</sup>, Trevor J.B. Dummer<sup>3</sup>

<sup>1</sup>Population Cancer Research Program, Department of Pediatrics, Dalhousie University, Halifax, NS, Canada

<sup>2</sup>School of Health and Human Performance, Dalhousie University, Halifax, NS, Canada

<sup>3</sup>Center of Excellence in Cancer Prevention, School of Prevention and Public Health, University of British Columbia, Vancouver, BC, Canada

**Supplementary Table 1. Mean intakes of fruit and vegetable and correlation between vegetable and fruit and body adiposity measurements**

|                                      | n     | Total fruit and vegetable                        |          | Vegetable | Fruit     | 100% fruit or vegetable juice |          |          |          |
|--------------------------------------|-------|--------------------------------------------------|----------|-----------|-----------|-------------------------------|----------|----------|----------|
| <b>Mean intake (SD), serving/day</b> | 26340 | 5.4 (2.6)                                        |          | 2.5 (1.5) | 2.1 (1.3) | 0.7 (1.0)                     |          |          |          |
|                                      |       | <i>Pearson partial correlation coefficients*</i> |          |           |           |                               |          |          |          |
| <i>Correlation</i>                   |       | <b>r</b>                                         | <b>P</b> | <b>r</b>  | <b>P</b>  | <b>r</b>                      | <b>P</b> | <b>r</b> | <b>P</b> |
| <b>Vegetable</b>                     | 26340 | 0.79                                             | <0.001   | -         | -         | -                             | -        | -        | -        |
| <b>Fruit</b>                         | 26340 | 0.77                                             | <0.001   | 0.41      | <0.001    | -                             | -        | -        | -        |
| <b>100% fruit or vegetable juice</b> | 26340 | 0.43                                             | <0.001   | 0.03      | <0.001    | 0.08                          | <0.001   | -        | -        |
| <b>Body mass index</b>               | 26340 | -0.03                                            | <0.001   | -0.03     | <0.001    | -0.02                         | <0.001   | -0.02    | 0.001    |
| <b>Waist circumference</b>           | 26340 | -0.04                                            | <0.001   | -0.03     | <0.001    | -0.04                         | <0.001   | -0.01    | 0.022    |
| <b>Waist-to-hip ratio</b>            | 26340 | -0.04                                            | <0.001   | -0.03     | <0.001    | -0.03                         | <0.001   | -0.01    | 0.348    |
| <b>Percentage fat mass</b>           | 18316 | -0.04                                            | <0.001   | -0.03     | <0.001    | -0.03                         | <0.001   | -0.01    | 0.066    |
| <b>Fat mass index</b>                | 18304 | -0.03                                            | <0.001   | -0.02     | 0.005     | -0.02                         | 0.002    | -0.02    | 0.030    |
| <b>Fat free mass index</b>           | 18302 | 0.00                                             | 0.693    | 0.00      | 0.916     | 0.01                          | 0.112    | -0.01    | 0.198    |

\* Adjusted for age and sex.

**Supplementary Table 2. Odds ratios for obesity and abdominal obesity by alternatively replacing one standard deviation of intakes of vegetable, fruit, and 100% fruit or vegetable juice**

| <b>Model</b>               | <b>Obesity, OR (95% CI)</b> |              | <b>Abdominal obesity, OR (95% CI)</b> |              |
|----------------------------|-----------------------------|--------------|---------------------------------------|--------------|
| <b>Fruit for vegetable</b> |                             |              |                                       |              |
| Simple model*              | 0.95                        | (0.91, 1.00) | 0.98                                  | (0.93, 1.03) |
| Multivariable model†       | 0.92                        | (0.88, 0.97) | 0.95                                  | (0.91, 1.00) |
| <b>Fruit for juice</b>     |                             |              |                                       |              |
| Simple model*              | 0.99                        | (0.95, 1.03) | 0.96                                  | (0.93, 1.00) |
| Multivariable model†       | 0.99                        | (0.95, 1.03) | 0.97                                  | (0.93, 1.01) |
| <b>Juice for vegetable</b> |                             |              |                                       |              |
| Simple model*              | 0.97                        | (0.93, 1.00) | 1.02                                  | (0.98, 1.05) |
| Multivariable model†       | 0.93                        | (0.90, 0.97) | 0.98                                  | (0.94, 1.02) |
| <b>Juice for fruit</b>     |                             |              |                                       |              |
| Simple model*              | 1.01                        | (0.97, 1.06) | 1.04                                  | (1.00, 1.08) |
| Multivariable model†       | 1.01                        | (0.97, 1.05) | 1.03                                  | (0.99, 1.07) |
| <b>Vegetable for fruit</b> |                             |              |                                       |              |
| Simple model*              | 1.05                        | (1.00, 1.10) | 1.02                                  | (0.97, 1.07) |
| Multivariable model†       | 1.08                        | (1.03, 1.14) | 1.05                                  | (1.00, 1.10) |
| <b>Vegetable for juice</b> |                             |              |                                       |              |
| Simple model*              | 1.04                        | (1.00, 1.08) | 0.99                                  | (0.95, 1.02) |
| Multivariable model†       | 1.07                        | (1.03, 1.12) | 1.02                                  | (0.98, 1.06) |

CI, confidence interval; OR, odds ratio.

\* Adjusted for age, sex, and province.

† Adjusted for age, sex, province, ethnicity, education, marital status, smoking, alcohol use, physical activity, and chronic disease.

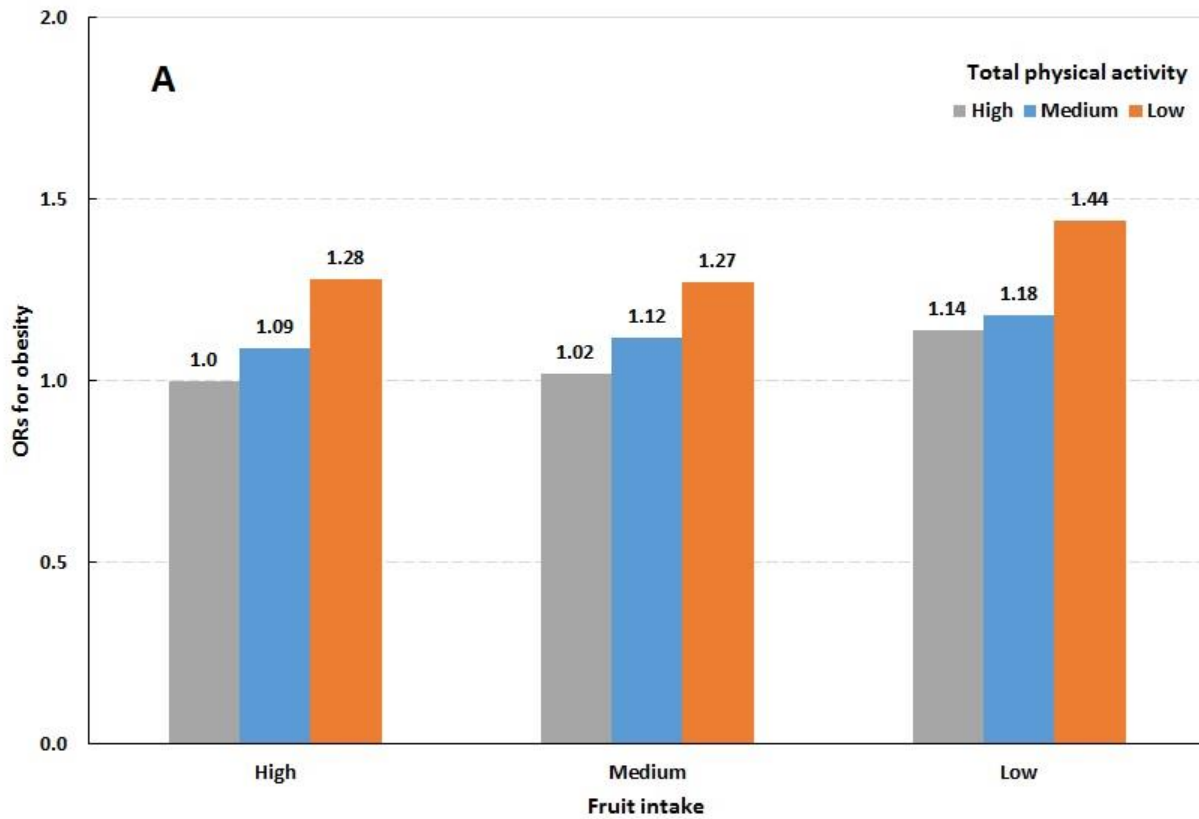

Supplementary Figure 1A. Joint associations of daily fruit intake and physical activity with risks of obesity<sup>a,b</sup>.

<sup>a</sup>Adjusted for age, sex, province, ethnicity, education, marital status, smoking, alcohol use, chronic disease, and intakes of vegetable and fruit or vegetable juice.

Participants with the high levels of both fruit intake and total physical activity was the reference group.

<sup>b</sup> $P$  for trend < 0.001 and  $P$  for interaction > 0.05.

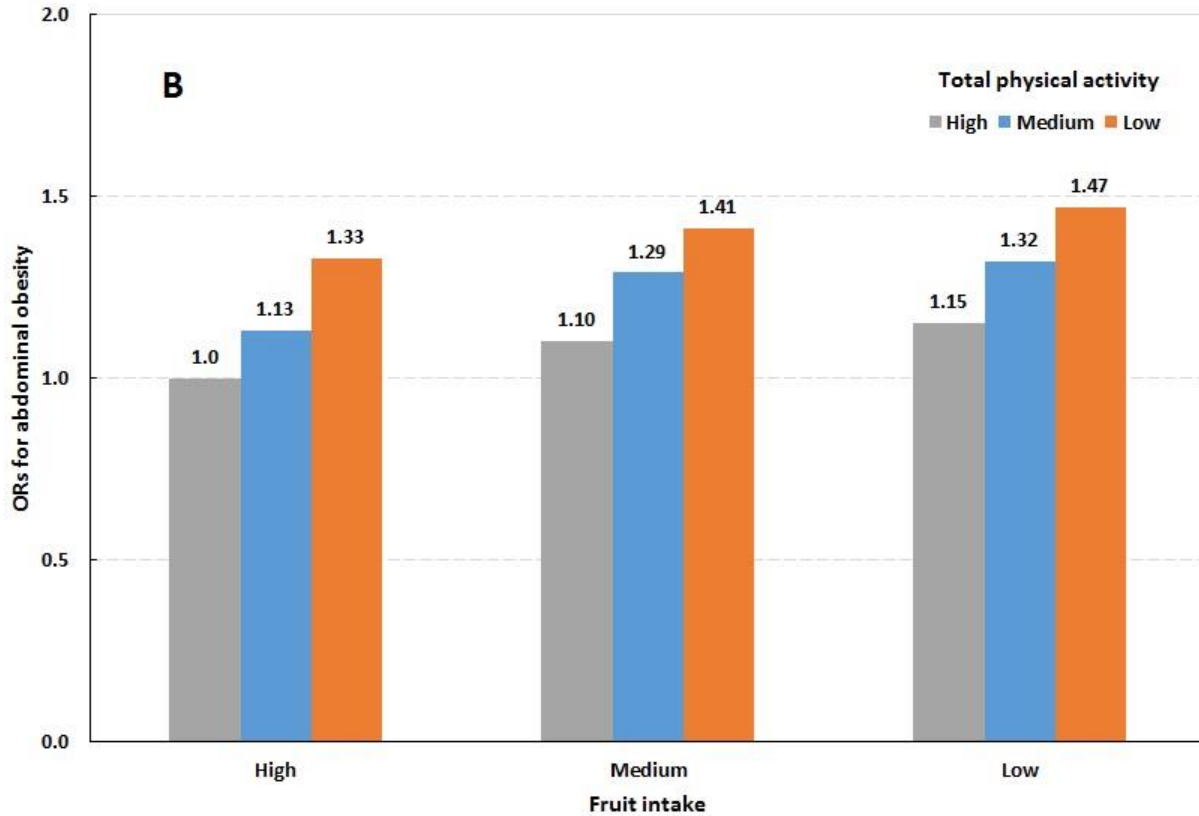

Supplementary Figure 1B. Joint associations of daily fruit intake and physical activity with risks of abdominal obesity<sup>a,b</sup>.

<sup>a</sup>Adjusted for age, sex, province, ethnicity, education, marital status, smoking, alcohol use, chronic disease, and intakes of vegetable and fruit or vegetable juice.

Participants with the high levels of both fruit intake and total physical activity was the reference group.

<sup>b</sup>*P* for trend < 0.001 and *P* for interaction > 0.05.
